1 **Short title:** Heterosis in Capsicum

2

3 **Corresponding author**

4 Agustin Zsögön  
5 Universidade Federal de Viçosa, Brazil  
6 Phone: +55 31 3899 2592  
7 Fax: +55 31 3899 4139  
8 EM: agustin.zsogon@ufv.br

9

10 **Hotter chili peppers by hybridisation: heterosis and reciprocal effects**

11 Emmanuel Rezende Naves<sup>1</sup>; Federico Scossa<sup>2</sup>; Wagner L. Araújo<sup>1</sup>; Adriano Nunes-  
12 Nesi<sup>1</sup>; Alisdair R. Fernie<sup>3</sup>; Agustin Zsögön<sup>1,3</sup>

13

14 **Affiliations**

15 <sup>1</sup> Departamento de Biologia Vegetal, Universidade Federal de Viçosa, CEP 36570-900,  
16 Viçosa, MG, Brazil

17 <sup>2</sup> Council for Agricultural Research and Economics (CREA), Research Centre for  
18 Genomics and Bioinformatics (CREA-GB), 00178, Rome, Italy

19 <sup>3</sup> Max-Planck-Institute for Molecular Plant Physiology, 14476 Potsdam, Germany

20

21 **Once sentence summary:** Hybrids of Capsicum peppers display heterosis and  
22 reciprocal effects for agronomic traits and fruit pungency

23

24 **List of author contributions:** A.Z. conceived the project and the research plan; E.R.N.  
25 performed the experiments; W.L.A. and A.N.-N. supervised the experiments; F.S. and  
26 A.R.F. designed experiments and analyzed data; E.R.N. wrote the article with  
27 contributions from all the authors. A.Z. supervised and completed the writing and  
28 agrees to serve as the author responsible for contact and ensures communication.

29

30 **Funding information:** AZ is supported by a CAPES/Alexander von Humboldt  
31 Foundation fellowship

32

33 **Email address of author for contact:** agustin.zsogon@ufv.br

34

### 35 **Abstract**

36 The selection of pure lines followed by crosses to create superior hybrids is one of the  
37 oldest strategies in crop breeding. However, in domesticated species of the *Capsicum*  
38 genus hybrid breeding has lagged, in part due to a lack of detailed information about the  
39 phenotypic and metabolic consequences of hybridization. Here, we performed  
40 reciprocal crosses between four inbred varieties of two species of cultivated *C. chinense*  
41 (cv. Habanero and Biquinho) and *C. annuum* var. *annuum* (cv. Jalapeño and cv.  
42 Cascadura Ikeda). These varieties were specifically selected for their highly divergent  
43 traits, including plant growth habit, fruit size, shape and pungency: Habanero and  
44 Jalapeño peppers are highly pungent forms, particularly popular in Mexico. The  
45 Biquinho cultivar of *C. chinense* and the Cascadura Ikeda bell pepper are traditional  
46 sweet cultivars from Brazil. From the parental genotypes and from the progeny of the  
47 reciprocal crosses, we measured 28 phenotypic traits, including plant growth, and yield,  
48 32 fruit shape parameters, and 50 fruit pericarp and placenta metabolites, including  
49 capsaicinoids. We found large differences for agronomic and metabolic traits between  
50 the genotypes, including heterosis for pungency and reciprocal effects for agronomic  
51 traits. We also show that the strong association between fruit shape and pungency can  
52 be broken in intraspecific hybrids, paving the way for the precision breeding of novel  
53 varieties.

54

55

## 56 **Introduction**

57 Heterosis, or hybrid vigour, is a genetic phenomenon whereby the hybrid  
58 progeny of different inbred strains, races or species of plants or animals results in  
59 increased vigour or performance. Charles Darwin described the phenomenon in the late  
60 19<sup>th</sup> century, but it was only in 1914 that G. H. Shull coined the term ‘heterosis’ and  
61 properly framed it conceptually (Hochholdinger and Baldauf, 2018). Large-scale  
62 cultivation of hybrid crops was introduced in the 1930s and has been growing steadily  
63 since, providing yield increases of up to 50%, depending on the crop. Although the  
64 genetic, epigenetic and expression bases for heterosis have been explored extensively  
65 (Chen, 2013), the metabolic aspects behind this phenomenon remains obscure.  
66 Significant advances have been made in understanding the metabolic basis of heterosis  
67 in maize (Riedelsheimer et al., 2012; Lima et al., 2017; Li et al., 2020) with the aim of  
68 establishing a ‘multi-omics’ platform for predictive hybrid breeding (Westhues et al.,  
69 2017). However, a similar effort is lacking in horticultural species, even though hybrid  
70 breeding is extensive in these crops (Yu et al., 2021). Here, we explore agronomic and  
71 metabolic aspects of heterosis in hybrids of peppers (*Capsicum* spp.).

72 Among the 41 species described in the *Capsicum* genus (Barboza et al., 2019),  
73 only five (*Capsicum annuum* var. *annuum*, *C. frutescens*, *C. chinense*, *C. baccatum* var.  
74 *pendulum*, and *C. pubescens*) have been domesticated (Pickersgill, 1997). With the  
75 exception of *C. pubescens*, which has limited importance today as a cultivated species,  
76 all remaining domesticates have been specifically bred to give rise to a high diversity of  
77 cultivars (Carrizo García et al., 2016), providing an excellent resource for the study of  
78 phenotypic variation induced by artificial selection (Pickersgill, 2018). The selection for  
79 fruit-related traits has brought in an amazing diversity of fruit colors, size and shapes

80 (Scossa et al., 2019), including a wide variation of pungency levels, with cultivated  
81 varieties covering the full spectrum from completely sweet to prohibitively hot fruits  
82 (Muñoz-Ramírez et al., 2018). The pungent taste of peppers is conferred by a class of  
83 vanillylamides, called capsaicinoids, which accumulate during ripening in the placenta  
84 of hot varieties (Naves et al., 2019). Capsaicinoids and other pepper phytochemicals  
85 have potential uses in the agrifood, cosmetic and pharmaceutical industries as  
86 replacements for synthetic additives (Baenas et al., 2019).

87       Being an autogamous species (with the only exception of *C. cardenasii*, which is  
88 an obligate outcrosser (Pickersgill, 1997), and as a consequence of the continuous  
89 process of purging deleterious mutations through artificial selection, cultivated varieties  
90 of *Capsicum* do not show inbreeding depression. However, heterosis (or hybrid vigour)  
91 has not been investigated in detail in *Capsicum* breeding, but increased yield, biomass  
92 and pungency was shown in some selected hybrids of *C. annuum* (Garcés-Claver et al.,  
93 2007; Singh et al., 2014). It has recently been shown that alterations in gene expression  
94 profile are associated with heterosis in pepper hybrids (Yang et al., 2021). Cultivation  
95 of F<sub>1</sub> hybrids rather than varieties could lead to higher yield and fruit quality, although  
96 many traits of agricultural importance are strongly influenced by environmental factors  
97 (Tripodi et al., 2020). Hybridization breeding also has the advantage of combining  
98 desirable horticultural and resistance traits faster than conventional pure line and  
99 pedigree selection, as it allows the combination of dominantly inherited traits (Zhao et  
100 al., 2015). However, the commercial exploitation of hybrids, which instead represent  
101 the fundamental breeding form in other crops, has not found so far large application in  
102 *Capsicum*, due to the existence of incompatibility barriers between species (Onus and  
103 Pickersgill, 2004) and to the absence of a convenient male-sterility system to avoid self-  
104 fertilization (Kim and Zhang, 2018).

105 *Capsicum* breeding programs have been limited by the relatively narrow genetic  
106 base exploited, mostly within the *C. annuum* cultivars (Pereira-Dias et al., 2019). Even  
107 though F<sub>1</sub> hybrids are widely grown for commercially produced sweet pepper, this is  
108 not the case for hot peppers. Here, we performed an in-depth analysis of the  
109 developmental, agronomic, and metabolic consequences of hybridization between of  
110 pungent and non-pungent commercial cultivars of *C. chinense* (cv. Habanero and cv.  
111 Biquinho) and *C. annuum* var. *annuum* (cv. Jalapeño and cv. Cascadura Ikeda). The  
112 varieties were specifically selected for their range of divergent traits, including plant  
113 growth habit, fruit size and shape and pungency: Habanero peppers are popular in the  
114 Yucatán peninsula of Mexico and some islands of the Caribbean and their fruits are  
115 characterized by strong pungency and fruity aroma. Cultivar Biquinho is a sweet pepper  
116 extremely popular in Brazil, where it is sold fresh or pickled as snack. Jalapeños are  
117 signature hot peppers which account for 30% of Mexico's hot pepper production  
118 (Sandoval-Castro et al., 2017), whereas Cascadura Ikeda is a traditional sweet bell  
119 pepper bred in Brazil. We analysed vegetative and reproductive growth traits, fruit size  
120 and shape parameters, and performed the metabolic profiling of fruit placentas and  
121 pericarps from full diallel (reciprocal) crosses between cultivars of the same or different  
122 species. We found that F<sub>1</sub> hybrids show agronomic traits whose phenotypic values in  
123 many cases are heterotic with respect their parents, and with a marked reciprocal effect.  
124 Lastly, we found a strong influence of the pollen genotype on fruit size and shape of  
125 hybrids. We discuss our findings in the context of the use of intraspecific and wide  
126 crosses for breeding new varieties of *Capsicum* with novel fruit traits and increased  
127 levels of pungency.

## 128 **Results**

129 *Hybridization impacts vegetative growth, yield and drives distinct patterns of*  
130 *correlation between phenotypic traits*

131         The parental genotypes (see Supplemental Table S1 for details) show contrasting  
132 growth habit: the cultivars of *C. chinense* (HAB, BIQ) display a predominantly  
133 horizontal canopy architecture, with more vigorous stems and smaller fruits (Fig. 1A).  
134 The cultivars of *C. annuum* (JAL, IKE) have instead a more upright canopy architecture  
135 and larger fruits (Fig. 1A). Intraspecific hybridization in *C. chinense* resulted in shorter  
136 and wider plants, whereas in *C. annuum* it produced plants as tall as the JAL parent, but  
137 with increased lateral growth (Fig. 1B). Interspecific hybrids showed increased  
138 vegetative development, with greater vertical (height) and horizontal (diameter) growth  
139 (Fig. 1C), greater leaf area, resulting in greater dry vegetative biomass but lower yield at  
140 the time of harvest (Table 1). We found higher leaf area and plant diameter in both  
141 intra- and interspecific hybrids (Table 1). Biomass partitioning was significantly  
142 different between parents and hybrids: Parents of both species showed high allocation to  
143 reproductive parts, whereas interspecific hybrids had increased vegetative biomass  
144 (Supplemental Fig. S1). All interspecific hybrids showed an increase in vegetative  
145 growth, mainly in stems and roots but also leaves, with severely reduced allocation to  
146 fruits (Supplemental Fig. S1). We found a marked reciprocal effect for vegetative  
147 growth in the JAL × IKE and HAB × JAL hybrids, which was increased compared to  
148 the IKE × JAL and JAL × HAB reciprocal hybrids (Supplemental Table S2).

149         Our initial analysis of 28 agronomic and growth parameters suggested that the  
150 main impact on yield in hybrids, particularly interspecific ones, was produced by  
151 increased vegetative growth (Supplemental Fig. S1). We next performed a principal  
152 component analysis (PCA) to reduce the dimensionality of the dataset and identify other  
153 potential traits that contribute most to the differenced observed between parents and

154 hybrids (Fig. 1D). The genotypes were divided in the 2D scores plot into three groups:  
155 *C. chinense* cultivars and their hybrids, *C. annuum* cultivars and their hybrids and  
156 interspecific hybrids (Fig. 1D). More than 80% of the variance was captured by the first  
157 four PCA axes, so we retained PC1 to PC4 for analysis (Supplemental Table S3).

158 PC1 explained 40.5% of the total variability between traits and genotypes and  
159 was associated mainly with vegetative traits: dry weight of the plant parts, number of  
160 sympodial units, plant width and leaf area. Confirming our initial observations, the most  
161 significant trait for PC1 was stem dry weight. All the *C. annuum* genotypes (parents and  
162 intraspecific hybrids) grouped at the lower end of PC1 and the interspecific hybrids at  
163 the higher end, as these were the genotypes with higher levels of vegetative growth,  
164 mainly driven by increased stem weight. The PC1 divided plant height and yield, where  
165 the taller genotypes were the least productive. PC2 accounted for 22% of the total  
166 variability among traits and was mostly related to plant height and fruit total soluble  
167 solids (Brix). Interspecific hybrids grouped at the higher end of PC2, while *C. chinense*  
168 genotypes (parents and intraspecific hybrids) grouped at the lower end. Hierarchical  
169 clustering analysis of the 28 traits confirmed the strong association between yield,  
170 harvest index, fruit set and number of seeds per fruit (Supplemental Fig. S2).

171

#### 172 *Hybridization conditions seed and fruit development in a genotype-specific manner*

173 All crosses set seeds successfully, and seed size was higher in *C. annuum* than in  
174 *C. chinense* cultivars and their respective intraspecific hybrids (Fig. 2A). Although seed  
175 weight was strongly determined by the female parent genotype, some paternal effect  
176 was observed for interspecific crosses, e.g. *C. annuum* pollen on *C. chinense* pistils  
177 decreased seed size, HAB pollen on BIQ pistils increased seed size and *C. chinense*

178 pollen increased seed size in JAL pistils (Fig. 2). For interspecific hybrids, using *C.*  
179 *annuum* as pistillate parent and *C. chinense* as pollen donor led to higher seed weight  
180 and the reciprocal cross to lower seed weight. Germination was higher in *C. annum*  
181 and lower in *C. chinense* intraspecific hybrids and severely compromised in  
182 interspecific hybrids (Fig. 2B). We observed strong unilateral incompatibility in seed  
183 germination: using *C. chinense* as pistillate parent and *C. annum* as pollen donor had a  
184 more negative effect than the reciprocal cross. Three of the interspecific hybrid seeds  
185 failed to germinate (BIQ × JAL, HAB × IKE and BIQ × IKE), so these genotypes are  
186 absent from all subsequent analyses.

187       Seed weight did not appear to have a strong effect on germination: for instance,  
188 in spite of large weight differences between parental genotypes seeds, there was no  
189 difference in germination between them (Fig. 2). By contrast, seed weight was strongly  
190 correlated to initial vegetative growth parameters (dry matter, plant height and diameter,  
191 leaf area) (Supplemental Fig. S3). Given the low fertility of interspecific F<sub>1</sub> hybrids, we  
192 conducted controlled pollination with either pollen from the hybrid itself or of either  
193 parent. Remarkably, the pollen genotype had a strong effect on fruit size and shape  
194 (Supplemental Fig. S4A). Pollination with parents was an effective method of restoring  
195 fertility, as fruit set and number of seeds per fruit were increased (Supplemental Fig.  
196 S4B).

### 197 *Capsicum* hybrids display heterosis and reciprocal effects for agronomic traits

198       Heterosis, or the superiority of hybrids to parents can be expressed as either  
199 relative mid-parent heterosis (rMPH) or relative best-parent heterosis (rBPH). We  
200 calculated these values for the intra- and interspecific hybrids and found significant  
201 rMPH and rBPH for many traits but also hybrid depression, depending on the trait and  
202 the type of cross (Table 2). The *C. chinense* intraspecific hybrids showed reduced plant



203 height, with no difference in this trait for *C. annuum*, whereas all the interspecific  
204 hybrids were taller. Plant diameter was also increased in all hybrids. Total vegetative  
205 dry mass was decreased in intra- but increased in interspecific hybrids. Fruit set was  
206 generally decreased in all hybrids with varying intensity, with the result that fruit  
207 number was also reduced. showed reduced plant height and increased diameter. Except  
208 for *C. chinense* hybrids, which showed a slight increase, all hybrids suffered yield  
209 penalty, with a particularly severe reduction in individual fruit weight (Table 2). Total  
210 soluble solids content in the fruits (Brix), however, was increased in all hybrids except  
211 the *C. chinense* intraspecific ones. We observed reciprocal effects in many agronomic  
212 traits for the *C. annuum* but not for the *C. chinense* hybrids (Supplemental Table S3).  
213 The remarkable changes in fruit size and shape inspired us to conduct a more in-depth  
214 analysis of these agronomically important traits.

215

#### 216 *Fruit shape shows non-additive inheritance*

217 Peppers are a genus with considerable fruit morphological variation, that is  
218 strongly associated with consumer preferences (Paran and van der Knaap, 2007). Thus,  
219 we next turned our attention to the effects of hybridization on fruit size and shape. The  
220 parental genotypes are highly contrasting in both traits (Fig. 3A). Individual fruit size of  
221 intraspecific hybrids was intermediate between that of the parental cultivars, whereas it  
222 was highly reduced in interspecific hybrids (Fig. 3B). Remarkably, the intraspecific  
223 hybrids resembled more closely one of the parents, regardless of the direction of the  
224 cross: BIQ in *C. chinense* hybrids and IKE in *C. annuum* (Fig. 3A). Given the  
225 multidimensional nature of fruit shape, we used TomatoAnalyzer (Rodríguez et al.,  
226 2010) to process scanned images of fruit sections and to provide an objective,  
227 quantitative assessment based on 32 fruit morphology traits. We conducted a PCA on

228 the traits and determined four main axes that could explain 91.3% of the variability in  
229 fruit size and shape (Fig. 3C).

230 PC1 accounted for 54.4% of the variability and was significantly associated with  
231 traits related to fruit size: cross-sectional fruit length and perimeter. Thus, the parental  
232 genotypes were divided along the PC1 according to fruit size (Fig. 3C). PC2 accounted  
233 for 18.6% of the fruit phenotype variability and was mostly associated with fruit shape  
234 (asymmetry, homogeneity and blockiness) (Supplemental Table S4). With its  
235 characteristic blocky, irregular fruit, *C. chinense* cv. HAB was located low along the  
236 PC2 axis and separated from all other genotypes. PC3 accounted for 10.7% of the  
237 variability in fruit shape and was associated with internal eccentricity and homogeneity  
238 traits and PC4 accounted for 7.6% of the variability with influence from pericarp traits.  
239 Our analysis also showed that the *C. chinense* intraspecific hybrids clustered very close  
240 to the BIQ cultivar, as suggested by their similarity in fruit phenotype (Fig. 3C). All the  
241 interspecific hybrid fruits were also located closer to BIQ than any other parental  
242 genotype due to their reduced size and their generally more triangular shape.

243

244 *Heterosis for pungency and primary metabolites in F1 hybrids is characterized by*  
245 *patterns of non-additive accumulation*

246 Capsicum fruits are noted for their pungency ('heat'), which is conferred by a  
247 class of metabolites collectively known as capsaicinoids, which accumulate in the  
248 placenta of pungent fruits. Since capsaicinoids are synthesized from amino acidic  
249 precursors, we carried out a detailed metabolic profiling of both polar and lipophilic  
250 primary metabolites in parental genotypes and their hybrids (Supplemental Fig. S5). As  
251 expected, the placental tissues of the pungent parents from both *C. chinense* (HAB) and

252 *C. annuum* (JAL) showed high accumulation of the main capsaicinoids, in contrast to  
253 the sweet pepper BIQ and IKE (Supplemental Fig. S4). The most abundant  
254 capsaicinoids were capsaicin ( $C_{18}H_{27}NO_3$ ,  $[M+H]^+=306.206356$ , dihydrocapsaicin  
255 ( $C_{18}H_{29}NO_3$ ,  $[M+H]^+=308.222006$ ) and nordihydrocapsaicin ( $C_{17}H_{27}NO_3$   
256  $[M+H]^+=294.206356$ ), which accounted for over 90% of total capsaicinoid content in  
257 all genotypes (Fig. 4). All hybrids were pungent, regardless of their parental genotypes  
258 and, except for the intraspecific hybrids of *C. annuum*, all combinations displayed  
259 significant degrees of both rMPH and rBPH for all of the main capsaicinoids (Table 3).  
260 Rather interestingly, the IKE  $\times$  BIQ  $F_1$ , which derives from the cross of two non-  
261 pungent parents, shows a high accumulation of capsaicinoids.

262 We then mapped the metabolite rBPH values onto the main pathways of primary  
263 metabolism and found that a few general trends emerged (Fig. 5 for the placenta and  
264 Supplemental Fig. S6 for the pericarp). We observed marked reciprocal effects on the  
265 level of several metabolites (mainly amino acids, e.g., serine, valine, aspartate, GABA  
266 and pyroglutamic acid) in the placenta of the fruits derived from the intraspecific *C.*  
267 *chinense* crosses (i.e., HAB  $\times$  BIQ and its reciprocal). This reversion of the heterotic  
268 effect was not observed in the other intraspecific cross (the one derived from crossing  
269 JAL and IKE, both cultivars of *C. annuum*), where most of the primary metabolites,  
270 including amino acids, show the same sign of rBPH irrespective of whether JAL or IKE  
271 was used as the female parent (Fig. 5A). Primary metabolites from the interspecific  
272 crosses (Fig. 5B) showed instead a more uniform pattern of hybrid depression (negative  
273 rBPH), except for trehalose and asparagine, which displayed considerable rBPH in the  
274 interspecific hybrids where IKE was used as female (Fig. 5B). In the pericarp  
275 (Supplemental Fig. S6), strong rBPH was detected for serine (along with its probable  
276 precursor, glycerate, given that serine biosynthesis in non-photosynthetic tissues mainly

277 occurs through the phosphorylated pathway (Galili et al., 2016), as well as for other  
278 amino acids derived from TCA intermediates (lysine, aspartate, asparagine and  
279 pyroglutamic acid).

280

## 281 **Discussion**

### 282 *The impact of hybridisation on vegetative and agronomic traits in Capsicum*

283         The most commonly produced and consumed peppers in the world belong to the  
284 *C. annuum* var. *annuum* (here *C. annuum* for brevity), whereas most sweet peppers are  
285 varieties of *C. annuum*, some of the most pungent varieties belong to *C. chinense* (Jang  
286 et al., 2021). *C. chinense* originates in the Amazon basin and is therefore better adapted  
287 to hot and humid conditions (Pickersgill, 2007), so accessions of this species are  
288 valuable sources of multiple pathogen resistance genes (Di Dato et al., 2015).  
289 Interspecific hybridisation would be a suitable avenue to combine the favourable traits  
290 found in different species of the genus. Hybrid breeding is the simplest way of  
291 combining dominantly inherited traits. Although considerable effort has been expended  
292 to explore the agronomic consequences of intraspecific hybridisation in *C. annuum*  
293 (Marame et al., 2009; Singh et al., 2014; Tripodi et al., 2020), little is known concerning  
294 the effects of hybridisation between species. Here, we found that clearly divergent traits  
295 have been favoured in the cultivars of each species selected for this study, the most  
296 remarkable being bigger fruits of *C. annuum* and more numerous fruits of *C. chinense*.  
297 The intraspecific hybrids of each species show additive effect for fruit weight in the *C.*  
298 *annuum* hybrids and fruit number in the *C. chinense* ones. Our results show that this  
299 directional selection had an impact on plant vegetative traits, as evidenced by the strong  
300 negative correlation between fruit number and plant height and a positive one with plant

301 diameter. By contrast, large fruits correlate negatively with plant and stem diameter and  
302 leaf area.

303 High yield was maintained in *C. chinense* hybrids but not in *C. annuum* ones and  
304 was severely compromised in interspecific hybrids. This suggests that the genetic  
305 control underlying the traits that control yield (fruit size, fruit number and fruit set) is  
306 recessive and, therefore, hybrid breeding is amenable only between cultivars where the  
307 agronomic basis for yield is similar (*i.e.* either fruit size or number). We also found a  
308 strong negative correlation between seed number and total soluble solids (Brix).  
309 Reducing seed number and increasing Brix are both desirable agronomic traits; the  
310 energetic cost of seed production could negatively impact fruit total solids (sugars and  
311 organic acids). High Brix is also negatively correlated with fruit size, as in tomato  
312 (Bernacchi et al., 1998).

313 Enhanced seed germination is a key agronomic trait in cultivated species, as  
314 opposed to their highly dormant wild ancestors (Soltani et al., 2021). When *C. annuum*  
315 was used as the female parent, all crossing combinations with *C. chinense* yielded  
316 viable hybrids. In the reciprocal crosses, when cultivars of *C. chinense* were instead  
317 used as the female parent, the only fertile hybrid we recovered was the combination  
318 HAB × JAL. This may suggest a general weakness of the maternal tissues of *C.*  
319 *chinense* - especially of cultivar BIQ - to provide nutrients to the embryo during the  
320 early developmental phases (Meyer et al., 2012). The size and viability of seeds can be  
321 affected by many different factors: the concurrent accumulation of capsaicinoids in the  
322 placenta (the tissue upon which seeds set and remain attached (Barchenger and Bosland,  
323 2016)), but also by many other maternal effects (*e.g.* transport processes to the  
324 developing seeds), depending on the species. Theory predicts that seed size is  
325 determined by the conflict between the paternal and maternal genotypes (Pires and

326 Grossniklaus, 2014). This would therefore result in a trade-off between seed size and  
327 number. Producing viable hybrids continues to be a major challenge for hybrid pepper  
328 breeding and further work needs to be conducted to understand the genetic and  
329 physiological basis of post-zygotic hybridization barriers (Lafon-Placette and Köhler,  
330 2016).

### 331 *Heterosis and reciprocal effects in Capsicum hybrids*

332 In peppers, heterosis is most likely to be observed as an increase in vegetative  
333 mass. Here, we found increased vegetative growth in both intra- and interspecific  
334 hybrids, however the effect was more dramatic in the latter, as it resulted in a strong  
335 yield penalty. Biomass allocation to reproductive tissues is a hallmark of crop  
336 domestication and breeding (Hufford et al., 2019). Our results highlight the diverging  
337 genetic bases of breeding for high yield in *C. annuum* and *C. chinense*. Pepper breeders  
338 have used wide crosses and introgression to generate high yielding varieties (Srivastava  
339 and Mangal, 2019). As a trade-off, these crops have less allocation of biomass to stems  
340 and roots, and increased susceptibility to diseases and pests. It is an open question why  
341 this was not observed in the crosses reported here. Interspecific hybridization would be  
342 a way to introduce vigorous characteristics such as stem and root or even to gain an  
343 understanding of related mechanisms and genes related to greater vegetative vigor. One  
344 of our interspecific crosses (IKE × BIQ) produced a vigorous root system (>25% of  
345 total biomass allocation), which could be relevant within the context of breeding  
346 improved rootstocks for grafting production systems (Kyriacou et al., 2017).

347 The asymmetry between the phenotypic value of certain traits (Supplemental  
348 Table S3) of reciprocal crosses is attributed to reciprocal effects, which could be related  
349 to cytoplasmic inheritance or nucleus-cytoplasm incompatibility mechanisms (Joseph et  
350 al., 2013). We found more marked reciprocal effects for *C. annuum* than for *C.*

351 *chinense*, particularly for vegetative biomass, fresh weight per fruit, number of seeds  
352 per fruit and Brix. Unilateral incompatibility is an extended phenomenon in *Capsicum*  
353 peppers (Onus and Pickersgill, 2004), however *C. annuum* and *C. chinense* are  
354 generally considered to be fully compatible. Here, we have shown that using *C. annuum*  
355 as a pistillate (female) parent leads to successful production of interspecific hybrids with  
356 *C. chinense* but the reciprocal type of cross is hampered by strong incompatibility.  
357 Further work is required to understand the underlying biological mechanisms and aid  
358 hybrid breeding in *Capsicum*.

359         We found considerable heterosis specifically for capsaicinoids accumulation in  
360 the placenta of both intra- and interspecific hybrids, including those derived from non-  
361 pungent parents (BIQ and IKE). This behavior of non-additive heterotic activation in  
362 the F<sub>1</sub> may be due to the complementation of non-functional alleles at distinct loci, with  
363 the restoration of a fully functional capsaicinoid pathway in the hybrids. By contrast, the  
364 pericarp metabolites of interspecific hybrids showed mid- to strong hybrid depression,  
365 except for several amino acids from the HAB × JAL combination (glycine, threonine,  
366 branched-chain and aromatic amino acids, lysine, aspartate, asparagine, GABA,  
367 pyroglutamic acid and GABA). Recent work on *Brassica juncea* showed that primary  
368 and secondary metabolites display both additive and non-additive inheritance,  
369 depending on tissue type (buds vs. leaves) and developmental stage (Bajpai et al. 2019).  
370 Here, most primary metabolites, whether from placenta or pericarp, generally showed  
371 non-additive accumulation (i.e., their levels being significantly lower or higher with  
372 respect to the best parent), with few cases of reciprocal effects detected for amino acids  
373 in the placenta of the intraspecific cross of *C. chinense*.

374 *The effect of hybridization on fruit size and shape*

375           *Capsicum* is a genus recognized and appreciated by consumers for its diversity  
376 in fruit shape and color (Scossa et al., 2019). To a large extent, the diversification is  
377 related to the geographic expansion and selection for culinary and aesthetic traits within  
378 the genus (Tripodi et al., 2021). Cultivars of *C. chinense* show high diversity in fruit  
379 formats and growth parameters (Rosado-Souza et al., 2015; Bianchi et al., 2020). The  
380 genetic basis of fruit size and shape is hitherto unknown in peppers, although an effort  
381 is underway to fill this gap in the knowledge (Colonna et al., 2019; Nimmakayala et al.,  
382 2021). Fruit shape is a multidimensional trait, so we broke it down in its individual  
383 components using the TomatoAnalyzer resource (Rodríguez et al., 2010). We then  
384 conducted a principal component analysis (PCA) and, as expected, the first principal  
385 component discriminated all parental cultivars mostly based on fruit size (cross  
386 sectional area, perimeter, width and length). By contrast, the second principal  
387 component was dominated by shape traits (blockiness, ellipsoid, asymmetry,  
388 eccentricity). Interestingly, the intraspecific hybrid fruits grouped together with the non-  
389 pungent parents, even when both were at the opposite extremes of the fruit size  
390 distribution (BIQ, smallest and IKE, biggest). This suggests that dominant genetic  
391 variance is a key component of fruit traits in non-pungent *Capsicum* varieties. Thus, our  
392 results show the feasibility of easily creating pungent fruits that retain the highly valued  
393 visual and organoleptic traits of non-pungent varieties.

394           Surprisingly, the pollen genotype had a strong impact on fruit size and shape.  
395 This apparently anomalous phenomenon was first described by Darwin as “the direct  
396 action of the male element on the female form” and subsequently called ‘xenia’. Xenia  
397 is widespread in cultivated species, including cereals, vegetables and fruit trees  
398 (Trueman et al., 2021). To the best of our knowledge, however, no reports exist of xenia  
399 in *Capsicum* (Liu, 2018). It is potentially a highly relevant phenomenon for plant



400 breeding and crop production, for instance, pollen origin can increase yield in beans  
401 (Duc et al., 2001), maize (Weingartner et al., 2002) and raspberry (Żurawicz et al.,  
402 2018). The molecular mechanism underlying xenia is unknown, and it has been  
403 proposed that small mobile RNAs derived from the pollen grain could trigger a massive  
404 reprogramming of gene expression in the zygote and embryo, which could in turn  
405 influence the surrounding ovary tissue. Our scheme of backcrosses of *Capsicum*  
406 interspecific hybrids could represent a useful model system to explore this topic.

407         The variation in shape, size and colour of pepper fruits can act as a marker for  
408 variation in other, less evident characters, such as pungency. This phenomenon whereby  
409 combinations of characters allow fruits to be distinguished is called ‘perceptual  
410 distinctiveness’ (Boster, 1985) and has been described in peppers and other species  
411 (Pickersgill, 2007). For a new cultivar to be accepted, it must be identifiable on the  
412 basis of a suite of characters and distinguishable from those already in cultivation.  
413 Pepper diversity depends on morphometric and colorimetric trait variation, which is  
414 critical for varietal identification and breeding (Nankar et al., 2020). Our results show  
415 that the strong association of small peppers with the characteristic ‘biquinho’ (‘little  
416 beak’) shape or the large blocky bell peppers with sweetness can be broken down to  
417 create hybrid varieties with a similar shape, but that are highly pungent.

## 418 **Conclusion**

419         Hybrid breeding has been underexploited in *Capsicum*, in large part due to a  
420 lack of knowledge about heterosis and reciprocal effects in different hybrid  
421 combinations. With the increasing challenge of unpredictable climate, exploiting the full  
422 range of natural variation for peppers and other crops will be a suitable avenue to create  
423 novel, resilient varieties. It can also pave the way for the creation of novel hybrids with  
424 altered combinations of visual and organoleptic traits, such as fruit size, shape, colour

425 and flavour. Here, we have shown that combinations of *C. annuum* var. *annuum* and *C.*  
426 *chinense* commercial varieties can produce valuable new agronomic phenotypes  
427 through heterosis and reciprocal effects. Further exploration of the genetic basis of these  
428 phenomena will contribute to the knowledge-based breeding of more resilient and  
429 appealing pepper varieties.

430

## 431 **Material and methods**

### 432 *Plant material and growth conditions*

433 Two cultivars of *Capsicum annuum* var. *annuum* (henceforth called *C. annuum*  
434 for brevity) were cultivated: the sweet bell pepper "Cascadura Ikeda" (IKE) and the  
435 pungent "Jalapeño" (JAL), while for *C. chinense*, the pungent cultivar "Habanero"  
436 (HAB) and the sweet "Biquinho" (BIQ) were grown (Table S1). Intra- and interspecific  
437 F<sub>1</sub> hybrids were created following a full diallel crossing scheme, by emasculating the  
438 flower buds before anthesis, and then transferring pollen of the selected male parent.  
439 The experiments were conducted in a greenhouse at the Federal University of Viçosa,  
440 between August 2018 and December 2019. For productivity analysis, each *Capsicum*  
441 hybrid and its respective parents (controls) were grown until harvest (when 70% of the  
442 fruits reached the ripe state) in 7.5 L pots containing the commercial substrate  
443 Troprotrato® and irrigated daily and fertilized with 4.5 g L<sup>-1</sup> of NPK (4-14-8) and 4 g  
444 L<sup>-1</sup> of dolomitic limestone. Supplemental fertilization was provided fortnightly with  
445 foliar spray. The compatibility between the parents, as well as the compatibility between  
446 the F<sub>1</sub> hybrids and their respective parents was measured through crosses in all possible  
447 combinations: 25 flowers were pollinated of four different plants per genotype (100  
448 flowers per cross). As a control, 100 flowers were tagged but self-pollinated. The fresh

449 weight, length, diameter and number of seeds per fruit were estimated for the 12 largest  
450 fruits among all produced from each controlled cross.

451

#### 452 *Seed germination assays*

453 To test seed germination, we sowed 100 seeds per block, with a total of four  
454 blocks. We pre-treated the seeds with 3% sodium hypochlorite and subsequently  
455 washed them with abundant deionized water before sowing. We sowed the seeds in  
456 plastic pots containing the commercial substrate Tropstrato® and kept them in  
457 greenhouse conditions in the summer. We counted the total number of emerged plants  
458 30 days after the sowing date and estimated the germination percentage.

459

#### 460 *Vegetative growth and agronomic determinations*

461 Thirty days after germination plants were transplanted to 7.5 L pots with  
462 Tropstrate commercial soil. Plants were grown to maturity and the following  
463 measurements were conducted on ten plants per genotype: plant height (height of soil  
464 base up to leaf apex), canopy diameter, stem diameter, number of leaves, leaf area, root,  
465 stem and leaves dry mass, stem diameter, number of leaves, soil base height up to the  
466 leaf apex and canopy diameter, number, time to anthesis and to first ripe fruit. At the  
467 time of harvest, productivity was determined as number and in total fresh weight of  
468 fruits per plant. The angle formed between the first ten branches was measured in  
469 addition to the total number of sympodial units per plant.

470

#### 471 *Fertility Estimation*

472 We measured fruit set (%), fruit size, number of seeds per fruit and seed  
473 germination rate. Fruit set was measured as the percentage of fruits developed from  
474 marked flowers at the time of anthesis. The average mass (g) of 100 F<sub>1</sub> seeds was also  
475 quantified ( $n = 6$ ) for the seeds resulting from crosses as self-pollination. The seeds  
476 were removed from fully ripe fruits and air-drying until they reached a constant weight.  
477 Germination tests were performed to verify the relationship between seed production,  
478 number, size and germination with fertility. One hundred seeds per replicate were sown  
479 30 days after sowing, the number of emerged seedlings was counted and expressed as  
480 the percentage germination.

481

#### 482 *Determination of fruit total soluble solids (Brix)*

483 Six fully ripe fruits per plant were harvested, totaling 60 fruits per genotype. The  
484 °Brix was determined through the digital bench refractometer model RTD-45  
485 (Instrutherm, São Paulo, Brazil). The analyses were performed after calibrating the  
486 refractometer with distilled water and obtaining the zero, after which the collector part  
487 was wiped clean, then the pericarp was squeezed to extract enough liquid to cover the  
488 prismatic surface of the digital refractometer.

489

#### 490 *Metabolic analyses of fruits*

491 Flowers were tagged at anthesis and samples of fruit pericarp and placenta were  
492 collected at midday after 60 days. The pericarp and placenta from seven fruits per  
493 genotype were collected from different plants and used for the analyses. Samples were  
494 immediately frozen in liquid nitrogen and stored at -80 °C. The material was then  
495 freeze-dried (Scanvac, Coolsafe 55-4) and ground to a fine powder. The metabolic

496 profile from each sample was determined following previously described procedures  
497 (Salem et al., 2017; Vijlder et al., 2018; Lapidot-Cohen et al., 2020), with modifications  
498 summarized briefly here. 10 mg of sample material was mixed with 1 mL of extraction  
499 buffer consisting of methyl-*tert*-butyl-ether and methanol (3:1), and containing an  
500 internal standard of 50  $\mu\text{L}$  corticosterone (1  $\text{mg mL}^{-1}$  in methanol), 50  $\mu\text{L}$  1,2-  
501 diheptadecanoyl-*sn*-glycero-3-phosphocholine (1  $\text{mg mL}^{-1}$  in chloroform) and 50  $\mu\text{L}$   
502 ribitol (1  $\text{mg mL}^{-1}$  in water). Samples were vortexed and incubated in a shaker (1000  
503 rpm) at 4°C for 45 min. 650  $\mu\text{L}$  of water:methanol (v/v 3:1) were then added to induce  
504 phase separation and the samples were centrifuged at 20000  $g$  for 5 min at room  
505 temperature. We then transferred aliquots from both the upper (apolar) and lower phase  
506 (polar and semi-polar metabolites) to new tubes to be reduced to dryness in the  
507 speedvac for subsequent metabolic analyses. The dried aliquots were stored at -80°C  
508 until derivatization or resuspension prior to GC- or LC-MS analyses.

509 For the analysis of primary metabolites, dried aliquots from the polar liquid  
510 phase were initially derivatized with 60  $\mu\text{L}$  of methoxiamine hydrochloride (30  $\text{mg mL}^{-1}$   
511 in pyridine) and shaken at 37°C for two hours. Sample extracts were then  
512 trimethylsilylated with 120  $\mu\text{L}$  of a mix of methyl-*N*-(trimethylsilyl)trifluoroacetamide  
513 (MSTFA) containing standards of fatty acid methyl esters (FAMEs), followed by  
514 agitation at 37°C for 30 minutes. Samples were spun briefly and a volume of 140  $\mu\text{L}$   
515 from each was transferred to glass vials and 1  $\mu\text{l}$  injected for gas chromatography-time  
516 of flight-mass spectrometry (GC-TOF-MS) as described previously (Osorio et al.,  
517 2012). Chromatograms and mass spectra were evaluated using ChromaTOF 1.0 (Leco,  
518 [www.leco.com](http://www.leco.com)) and TagFinder v.4.0, respectively. Cross-referencing of mass spectra  
519 was performed with the Golm Metabolome database (Kopka et al., 2005).

520 For the analysis of apolar metabolites, dried aliquots from the upper lipid phase  
521 were resuspended in 400  $\mu$ L of acetonitrile:2-propanol 7:3 (v/v) and 140  $\mu$ L were then  
522 transferred to glass vials for injection into an ultra-performance liquid chromatography  
523 system coupled to a Q Exactive mass spectrometer in positive ionization mode (UPLC-  
524 MS), according to established protocols (Lapidot-Cohen et al., 2020). In any case, both  
525 for the primary and lipid metabolic datasets, standardized metabolite intensities  
526 (standardized by internal standard and weight) were then batch-corrected (ComBat),  
527 normalized by *glog* transformation and autoscaled (mean-centered and divided by the  
528 standard deviation of each variable) using MetaboAnalyst v5.0 (Pang et al., 2021). The  
529 results for metabolites are reported following the standards suggested in Fernie et al. (  
530 2011).

#### 531 *Fruit biometry*

532 Twelve fruits were sampled from each parental and hybrid genotype. In addition,  
533 as interspecific hybrids showed different morphology and large increases in fruit size  
534 when they received pollen from parents, we decided to include them in these analyzes.  
535 The fruits were cut longitudinally and were digitized in a scanner (HP Scanjet G2410).  
536 In some cases, the fruits had the biometric contours adjusted manually in order to  
537 correct points of non-detection in the image. The biometric determinations were carried  
538 out using Tomato Analyzer v4.0, and 32 parameters were measured as previously  
539 described (Rodríguez et al., 2010).

540

#### 541 *Estimation of heterosis*

542 The experiments were carried out in a completely randomized design, always  
543 with the parents being cultivated together with their hybrids in their respective growing

544 season. Each set of phenotypic traits were subjected to analysis of variance; in those  
545 cases where the null hypothesis of equal means was rejected, we used the Scott-Knott  
546 test with  $\alpha=0.05$  to identify the significant differences. Heterosis calculations were  
547 performed for the main parameters evaluated, using the following equations (Barth et  
548 al., 2003):

549 Absolute Mid-Parent Heterosis (AMPH) =  $F_1 - \bar{P}$

550 Absolute Best Parent Heterosis (ABPH) =  $F_1 - P_{\max}$ ,

551 where:  $F_1$ : average value of the phenotypic trait from the  $F_1$  hybrid;  $\bar{P}$ : average value of  
552 the phenotypic trait of the two parental genotypes; and  $P_{\max}$ : Average value of the  
553 phenotypic trait from the best parent.

554 In addition, heterosis relative values were calculated as:

555 Relative Mid-Parent Heterosis (rMPH) =  $(AMPH / \bar{P}) * 100$

556 Relative Best Parent Heterosis (rBPH) =  $(ABPH / P_{\max}) * 100$

557 The reciprocal effect for the HAB  $\times$  JAL, JAL  $\times$  IKE and HAB  $\times$  BIQ hybrids  
558 was determined as the difference in a given parameter between the reciprocal hybrids,  
559 e.g.: (HAB  $\times$  JAL) - (JAL  $\times$  HAB). The absolute values of heterosis and reciprocal  
560 effect were subjected to ANOVA and subsequently subjected to Scheffe's test in order  
561 to verify the significance of each value individually.

562

563 **Acknowledgements**

564 AZ acknowledges a CAPES/Alexander von Humboldt Foundation fellowship. We thank  
 565 Prof. Fábio DaMatta (UFV) and Prof. Lázaro Peres (USP) for valuable input in the  
 566 project.

567

568 **Tables**

569 **Table 1.** Agronomic traits in intra- and interspecific hybrids of *Capsicum chinense* cv. Habanero (HAB) and  
 570 cv. Biquinho (BIQ); and *C. annuum* cv. Jalapeño (JAL), and cv. Cascadura Ikeda (IKE) determined 180 days  
 571 after sowing. The pungent genotypes are shown in **boldface**. Values are means  $\pm$  s.e.m. (n=10 plants).  
 572 Different letters within each column indicate significant differences by the Scott-Knot test at 5%.

| Genotypes                          | Plant height (cm)           | Plant diameter (cm)         | Leaf area (m <sup>2</sup> ) | Yield (g)                    |
|------------------------------------|-----------------------------|-----------------------------|-----------------------------|------------------------------|
| <i>Parents</i>                     |                             |                             |                             |                              |
| <b>HAB</b>                         | 59.70 $\pm$ 2.13 <b>f</b>   | 94.7 $\pm$ 2.09 <b>d</b>    | 0.664 $\pm$ 0.03 <b>d</b>   | 862.00 $\pm$ 65.75 <b>c</b>  |
| BIQ                                | 65.56 $\pm$ 1.65 <b>f</b>   | 104.22 $\pm$ 4.80 <b>d</b>  | 0.710 $\pm$ 0.03 <b>d</b>   | 810.11 $\pm$ 31.93 <b>c</b>  |
| <b>JAL</b>                         | 66.80 $\pm$ 2.67 <b>f</b>   | 71.40 $\pm$ 2.53 <b>e</b>   | 0.368 $\pm$ 0.02 <b>f</b>   | 1243.47 $\pm$ 78.09 <b>b</b> |
| IKE                                | 80.89 $\pm$ 2.58 <b>e</b>   | 61.11 $\pm$ 2.05 <b>e</b>   | 0.576 $\pm$ 0.02 <b>e</b>   | 2097.83 $\pm$ 75.58 <b>a</b> |
| <i>Intraspecific F<sub>1</sub></i> |                             |                             |                             |                              |
| <b>HAB</b> $\times$ BIQ            | 44.75 $\pm$ 4.64 <b>g</b>   | 165.90 $\pm$ 6.5 <b>a</b>   | 0.946 $\pm$ 0.03 <b>c</b>   | 927.32 $\pm$ 57.16 <b>c</b>  |
| BIQ $\times$ <b>HAB</b>            | 44.65 $\pm$ 3.37 <b>g</b>   | 154.5 $\pm$ 6.15 <b>b</b>   | 0.867 $\pm$ 0.04 <b>c</b>   | 943.78 $\pm$ 48.74 <b>c</b>  |
| <b>JAL</b> $\times$ IKE            | 77.60 $\pm$ 4.49 <b>e</b>   | 80.70 $\pm$ 1.83 <b>e</b>   | 0.362 $\pm$ 0.03 <b>f</b>   | 596.99 $\pm$ 56.85 <b>d</b>  |
| IKE $\times$ <b>JAL</b>            | 71.10 $\pm$ 4.39 <b>f</b>   | 68.3 $\pm$ 3.02 <b>e</b>    | 0.364 $\pm$ 0.02 <b>f</b>   | 439.98 $\pm$ 62.13 <b>e</b>  |
| <i>Interspecific F<sub>1</sub></i> |                             |                             |                             |                              |
| <b>HAB</b> $\times$ <b>JAL</b>     | 135.80 $\pm$ 6.38 <b>c</b>  | 122.10 $\pm$ 4.5 <b>c</b>   | 0.820 $\pm$ 0.06 <b>c</b>   | 197.05 $\pm$ 56.99 <b>f</b>  |
| <b>JAL</b> $\times$ <b>HAB</b>     | 106.90 $\pm$ 5.01 <b>d</b>  | 100.8 $\pm$ 5.66 <b>d</b>   | 0.754 $\pm$ 0.04 <b>d</b>   | 263.51 $\pm$ 55.74 <b>e</b>  |
| <b>JAL</b> $\times$ BIQ            | 134.0 $\pm$ 6.28 <b>c</b>   | 133.6 $\pm$ 5.04 <b>c</b>   | 0.842 $\pm$ 0.09 <b>c</b>   | 419.83 $\pm$ 98.72 <b>e</b>  |
| IKE $\times$ <b>HAB</b>            | 161.47 $\pm$ 7.51 <b>b</b>  | 176.13 $\pm$ 12.10 <b>a</b> | 1.407 $\pm$ 0.11 <b>a</b>   | 103.09 $\pm$ 34.59 <b>f</b>  |
| IKE $\times$ BIQ                   | 174.430 $\pm$ 2.47 <b>a</b> | 170.7 $\pm$ 5.67 <b>a</b>   | 1.232 $\pm$ 0.03 <b>b</b>   | 280.51 $\pm$ 49.26 <b>f</b>  |

573

574 **Table 2.** Relative mid-parental heterosis (rMPH) and best-parental heterosis (rBPH) for twelve traits in two  
 575 intraspecific and four interspecific hybrids of *Capsicum*. Parents: *C. chinense* cv. Habanero (HAB), *C. chinense*  
 576 cv. Biquinho (BIQ), *C. annuum* cv. Jalapeño (JAL) and *C. annuum* cv. Cascadura Ikeda (IKE). The pungent  
 577 genotypes are shown in **boldface**. The significance test for the variables rMPH and rBPH was performed based  
 578 on the absolute values of MPH and BPH. \*, \*\* indicate significant values at  $p = 0.05$  and  $0.01$ , respectively by  
 579 the Scheffe test.



|      | Hybrids                      |                  |                              |                  |                  |           |
|------|------------------------------|------------------|------------------------------|------------------|------------------|-----------|
|      | Intraspecific F <sub>1</sub> |                  | Interspecific F <sub>1</sub> |                  |                  |           |
|      | <b>HAB</b> × BIQ             | <b>JAL</b> × IKE | <b>HAB</b> × <b>JAL</b>      | <b>JAL</b> × BIQ | IKE × <b>HAB</b> | IKE × BIQ |
|      | Plant height                 |                  |                              |                  |                  |           |
| rMPH | -28.63 **                    | 0.68             | 91.86 **                     | 102.48 **        | 129.71 **        | 138.04 ** |
| rBPH | -31.81 **                    | -8.08            | 81.66 **                     | 100.6 **         | 99.62 **         | 115.48 ** |
|      | Plant diameter               |                  |                              |                  |                  |           |
| rMPH | 61.07 **                     | 12.44 *          | 34.2 **                      | 52.14 **         | 126.08 **        | 106.49 ** |
| rBPH | 53.71 **                     | 4.34             | 17.69 **                     | 28.19 **         | 85.99 **         | 63.78 **  |
|      | Dry vegetative biomass       |                  |                              |                  |                  |           |
| rMPH | -23.01 **                    | -41.50**         | 301.12 **                    | 75.28 **         | 93.36 **         | 332.77 ** |
| rBPH | -24.38 **                    | -49.55 **        | 186.50 **                    | 23.85 **         | 53.83 **         | 239.75 ** |
|      | Fruit set                    |                  |                              |                  |                  |           |
| rMPH | -2.23                        | -14.67           | -70.73 **                    | -54.92 **        | -99.47 **        | -83.71 ** |
| rBPH | -27.99 *                     | -32.73 **        | -78.04 **                    | -56.16 **        | -99.60 **        | -87.42 ** |
|      | Number of fruits per plant   |                  |                              |                  |                  |           |
| rMPH | -5.09                        | -74.68 **        | -22.94                       | -51.43 **        | -4.11            | -55.29 ** |
| rBPH | -45.01 **                    | -75.03 **        | -41.8 **                     | -73.75 **        | -28.26           | -75.88 ** |
|      | Yield                        |                  |                              |                  |                  |           |
| rMPH | 11.90                        | -68.97 **        | -78.13 **                    | -59.11 **        | -93.03 **        | -80.71 ** |
| rBPH | 8.53                         | -75.28 **        | -81.48 **                    | -66.24 **        | -95.09 **        | -86.63 ** |
|      | Fresh weight per fruit       |                  |                              |                  |                  |           |
| rMPH | -38.97 **                    | -22.90 *         | -78.00 **                    | -86.38 **        | -92.14 **        | -92.72 ** |
| rBPH | -63.42 **                    | -46.55 **        | -85.05 **                    | -92.70 **        | -95.53 **        | -96.26 ** |
|      | Brix °                       |                  |                              |                  |                  |           |
| rMPH | -7.21 **                     | 3.86 **          | 31.48 **                     | 34.14 **         | 16.02 **         | 31.26 **  |
| rBPH | -17.18**                     | 1.56             | 19.89 **                     | 30.96 **         | 8.01             | 25.3 **   |

580

581 **Table 3.** Relative mid-parental heterosis (rMPH) and best-parental heterosis (rBPH) for the accumulation of the  
582 three main capsaicinoids (capsaicin, dihydrocapsaicin and nordihydrocapsaicin) and for the total capsaicinoids in  
583 the placenta of fully ripe fruits in intraspecific and interspecific hybrids of *Capsicum*. Parents: *C. chinense* cv.  
584 Habanero (HAB), *C. chinense* cv. Biquinho (BIQ), *C. annuum* cv. Jalapeño (JAL) and *C. annuum* cv. Cascadura  
585 Ikeda (IKE). The pungent genotypes are shown in **boldface**.

Hybrids

| Genotype            | Intraspecific F <sub>1</sub> |                     |                     |                     | Interspecific F <sub>1</sub> |                            |                     |                     |                |
|---------------------|------------------------------|---------------------|---------------------|---------------------|------------------------------|----------------------------|---------------------|---------------------|----------------|
|                     | <b>HAB</b> ×<br>BIQ          | BIQ ×<br><b>HAB</b> | <b>JAL</b> ×<br>IKE | IKE ×<br><b>JAL</b> | <b>HAB</b> ×<br><b>JAL</b>   | <b>JAL</b> ×<br><b>HAB</b> | <b>JAL</b> ×<br>BIQ | IKE ×<br><b>HAB</b> | IKE ×<br>BIQ   |
| Capsaicin           |                              |                     |                     |                     |                              |                            |                     |                     |                |
| rMPH                | 300.70<br>**                 | 328.46<br>**        | -34.7               | 54.59               | 132.16 **                    | 168.11 **                  | 347.05 **           | 184.16 **           | 39493.63<br>** |
| rBPH                | 101.65<br>**                 | 115.63<br>**        | -67.35<br>**        | -22.69              | 99.90 **                     | 130.85 **                  | 125.54 **           | 42.10 **            | 20027.80<br>** |
| Dihydrocapsaicin    |                              |                     |                     |                     |                              |                            |                     |                     |                |
| rMPH                | 161.43<br>**                 | 217.84<br>**        | -31.96              | 127.22<br>**        | 79.89 **                     | 75.87 **                   | 186.84 **           | 189.16 **           | 76568.97<br>** |
| rBPH                | 31.03<br>**                  | 59.30 **            | -65.98<br>**        | 13.62               | 61.71 **                     | 58.10 **                   | 43.85 **            | 44.59 *             | 39402.03<br>** |
| Nordihydrocapsaicin |                              |                     |                     |                     |                              |                            |                     |                     |                |
| rMPH                | 58.92<br>**                  | 131.32<br>**        | -8.59               | 307.87<br>**        | 94.36 **                     | 47.29 *                    | 117.87 **           | 453.92 **           | 46169.57<br>** |
| rBPH                | -20.28<br>**                 | 16.04 *             | -54.29<br>**        | 103.94<br>**        | 42.15 **                     | 7.73                       | 9.1                 | 176.96 **           | 23034.78<br>** |
| Total Capsaicinoids |                              |                     |                     |                     |                              |                            |                     |                     |                |
| rMPH                | 2745.10<br>**                | 284.14<br>**        | -31.64              | 100.57<br>**        | 111.88 **                    | 129.49 **                  | 272.43 **           | 193.87 **           | 45860.17<br>** |
| rBPH                | 1322.81<br>**                | 93.03 **            | -65.82<br>**        | 0.300               | 89.74 **                     | 105.52 **                  | 87.39 **            | 46.95 **            | 23034.78<br>** |

586

## 587 Figure legends

588 **Figure 1. Figure 1. Representative *Capsicum* plants and phenotypic analysis of**  
589 **their growth and agronomic traits.** A, representative plants of the parental genotypes:  
590 *Capsicum chinense* cv. Habanero (HAB) and cv. Biquinho (BIQ), *C. annuum* cv.  
591 Jalapeño (JAL) and cv. Ikeda (IKE). B, intraspecific hybrids; C, interspecific hybrids.  
592 Scale bars = 15 cm. The genotypes with pungent fruits are shown in **boldface**. D, PCA  
593 biplot of 13 *Capsicum* genotypes (parents, intraspecific and interspecific hybrids), based  
594 on the variance of the 28 traits listed in Supplemental Table S3, explained by two PC  
595 axes (PC1 and PC2). The two first components explain 40.5% and 22% of the variance,

596 respectively. Different colours represent the different genotypes, pungent genotypes are  
597 underlined. Aligned vectors indicate positive and perpendicular vector negative  
598 correlation between traits. The numbers represent each individual sample, listed in the  
599 Supplemental Data files.

600 **Figure 2. Seed traits in *Capsicum* cultivars and their hybrids.** A, Seed weight and B,  
601 germination in *Capsicum chinense* cv. Habanero (HAB) and cv. Biquinho (BIQ) and C.  
602 *annuum* cv. Jalapeño (JAL) and cv. Cascadura Ikeda (IKE) and their intra- and  
603 interspecific hybrids. The first genotype in each cross represents the pistillate parent.  
604 The pungent genotypes are shown in **boldface**. Different letters differ by Scott Knott's  
605 5% test.

606 **Figure 3. Fruit size and shape in *Capsicum chinense* cv. Habanero (HAB) and cv.**  
607 **Biquinho (BIQ) and *C. annum* cv. Jalapeño (JAL) and cv. Cascadura Ikeda**  
608 **(IKE), and their intra- and interspecific F1 hybrids.** A, Representative fruit cross-  
609 sections of *Capsicum* parental lines (top), intraspecific hybrids (middle) and  
610 interspecific hybrids (bottom). The pungent genotypes are shown in **boldface**. Scale  
611 bars 2 = cm. B, individual fruit fresh weight (g). Bars are means  $\pm$  s.e.m. (n=10). Letters  
612 show significant differences by ANOVA followed by Scot Knott's 5% test. C, PCA  
613 biplot of 13 *Capsicum* genotypes (parents, intraspecific and interspecific hybrids) based  
614 on the variance in 32 fruit biometric parameters, explained by two PC axes (PC1 and  
615 PC2). The two components explained 54.04% and 18.61% of the variance, respectively.  
616 Parental genotypes are represented by circles of different colours, intraspecific *C.*  
617 *annuum* hybrids by blue with black outline, *C. chinense* by red with black outline and  
618 interspecific hybrids in gray. The pungent genotypes are shown in **boldface**.

619 **Figure 4. Relative capsaicinoid content in the placenta of *Capsicum chinense* cv.**  
620 **Habanero (HAB), cv. Biquinho (BIQ), and *C. annum* cv. Jalapeño (JAL) and cv.**

621 **Cascadura Ikeda (IKE) and their intra- and interspecific hybrids.** The pungent  
622 genotypes are shown in **boldface**. Each column represents the mean value per genotype  
623 (n=7).

624 **Figure 5. Heat map showing heterosis for primary metabolites and capsaicinoids in**  
625 **the fruit placenta of *Capsicum chinense* cv. Habanero (HAB), cv. Biquinho (BIQ),**  
626 **and *C. annuum* cv. Jalapeño (JAL) and cv. Cascadura Ikeda (IKE) hybrids. A,**  
627 **intraspecific and B, interspecific hybrids. The pungent genotypes are shown in**  
628 **boldface.** Each square represents a genotype (n=7). The color key indicates the relative  
629 best parent heterosis (BPH) value (red = higher, blue = lower).

630

## 631 **References**

632

633 Baenas N, Belović M, Ilic N, Moreno DA, García-Viguera C (2019) Industrial use of  
634 pepper (*Capsicum annuum* L.) derived products: Technological benefits and  
635 biological advantages. *Food Chemistry* 274: 872–885

636 Bajpai PK, Reichelt M, Augustine R, Gershenzon J, Bisht NC (2019) Heterotic patterns  
637 of primary and secondary metabolites in the oilseed crop *Brassica juncea*.  
638 *Heredity* 123: 318–336

639 Barboza GE, García CC, González SL, Scaldaferrro M, Reyes X (2019) Four new  
640 species of *Capsicum* (Solanaceae) from the tropical Andes and an update on the  
641 phylogeny of the genus. *PLOS ONE* 14: e0209792

642 Barchenger DW, Bosland PW (2016) Exogenous applications of capsaicin inhibits seed  
643 germination of *Capsicum annuum*. *Scientia Horticulturae* 203: 29–31

644 Barth S, Busimi AK, Friedrich Utz H, Melchinger AE (2003) Heterosis for biomass  
645 yield and related traits in five hybrids of *Arabidopsis thaliana* L. Heynh.  
646 *Heredity* 91: 36–42

647 Bernacchi D, Beck-Bunn T, Eshed Y, Lopez J, Petiard V, Uhlig J, Zamir D, Tanksley S  
648 (1998) Advanced backcross QTL analysis in tomato. I. Identification of QTLs  
649 for traits of agronomic importance from *Lycopersicon hirsutum*. *Theor Appl*  
650 *Genet* 97: 381–397

651 Bianchi PA, Silva LRA da, Alencar AA da S, Santos PHAD, Pimenta S, Sudre CP,  
652 Corte LE-D, Goncalves LSA, Rodrigues R (2020) Biomorphological  
653 Characterization of Brazilian *Capsicum Chinense* Jacq. *Germplasm. Agronomy*  
654 10: 1ec–1ec

- 655 Boster JS (1985) Selection for perceptual distinctiveness: Evidence from aguaruna  
656 cultivars of *Manihot esculenta*. *Econ Bot* 39: 310–325
- 657 Carrizo García C, Barfuss MHJ, Sehr EM, Barboza GE, Samuel R, Moscone EA,  
658 Ehrendorfer F (2016) Phylogenetic relationships, diversification and expansion  
659 of chili peppers (*Capsicum*, Solanaceae). *Annals of Botany* 118: 35–51
- 660 Chen ZJ (2013) Genomic and epigenetic insights into the molecular bases of heterosis.  
661 *Nature Reviews Genetics* 14: 471–82
- 662 Colonna V, D’Agostino N, Garrison E, Albrechtsen A, Meisner J, Facchiano A, Cardi  
663 T, Tripodi P (2019) Genomic diversity and novel genome-wide association with  
664 fruit morphology in *Capsicum*, from 746k polymorphic sites. *Sci Rep* 9: 10067
- 665 Di Dato F, Parisi M, Cardi T, Tripodi P (2015) Genetic diversity and assessment of  
666 markers linked to resistance and pungency genes in *Capsicum* germplasm.  
667 *Euphytica* 204: 103–119
- 668 Duc G, Moessner A, Moussy F, Mousset-Déclas C (2001) A xenia effect on number and  
669 volume of cotyledon cells and on seed weight in faba bean (*Vicia faba* L.).  
670 *Euphytica* 117: 169–174
- 671 Fernie AR, Aharoni A, Willmitzer L, Stitt M, Tohge T, Kopka J, Carroll AJ, Saito K,  
672 Fraser PD, DeLuca V (2011) Recommendations for reporting metabolite data.  
673 *Plant Cell* 23: 2477–82
- 674 Galili G, Amir R, Fernie AR (2016) The Regulation of Essential Amino Acid Synthesis  
675 and Accumulation in Plants. *Annual Review of Plant Biology* 67: 153–178
- 676 Garcés-Claver A, Gil-Ortega R, Álvarez-Fernández A, Arnedo-Andrés MS (2007)  
677 Inheritance of Capsaicin and Dihydrocapsaicin, Determined by HPLC-ESI/MS,  
678 in an Intraspecific Cross of *Capsicum annum* L. *J Agric Food Chem* 55: 6951–  
679 6957
- 680 Hochholdinger F, Baldauf JA (2018) Heterosis in plants. *Curr Biol* 28: R1089–R1092
- 681 Hufford MB, Berny Mier y Teran JC, Gepts P (2019) Crop Biodiversity: An Unfinished  
682 *Magnum Opus of Nature*. *Annual Review of Plant Biology* 70: 727–751
- 683 Jang S, Park M, Lee D-G, Lim J-H, Jung J-W, Kang B-C (2021) Breeding *Capsicum*  
684 *chinense* Lines with High Levels of Capsaicinoids and Capsinoids in the Fruit.  
685 *Agriculture* 11: 819
- 686 Joseph B, Corwin JA, Li B, Atwell S, Kliebenstein DJ (2013) Cytoplasmic genetic  
687 variation and extensive cytonuclear interactions influence natural variation in the  
688 metabolome. *eLife* 2: e00776
- 689 Kim Y-J, Zhang D (2018) Molecular Control of Male Fertility for Crop Hybrid  
690 Breeding. *Trends in Plant Science* 23: 53–65

- 691 Kopka J, Schauer N, Krueger S, Birkemeyer C, Usadel B, Bergmüller E, Dörmann P,  
692 Weckwerth W, Gibon Y, Stitt M, et al (2005) Systems biology  
693 GMD@CSB.DB : the Golm Metabolome Database. 21: 1635–1638
- 694 Kyriacou MC, Roupael Y, Colla G, Zrenner R, Schwarz D (2017) Vegetable Grafting:  
695 The Implications of a Growing Agronomic Imperative for Vegetable Fruit  
696 Quality and Nutritive Value. *Frontiers in Plant Science* 8: 741
- 697 Lafon-Placette C, Köhler C (2016) Endosperm-based postzygotic hybridization barriers:  
698 developmental mechanisms and evolutionary drivers. *Molecular Ecology* 25:  
699 2620–2629
- 700 Lapidot-Cohen T, Rosental L, Brotman Y (2020) Liquid Chromatography–Mass  
701 Spectrometry (LC-MS)-Based Analysis for Lipophilic Compound Profiling in  
702 Plants. *Current Protocols in Plant Biology* 5: e20109
- 703 Li Z, Zhu A, Song Q, Chen HY, Harmon FG, Chen ZJ (2020) Temporal Regulation of  
704 the Metabolome and Proteome in Photosynthetic and Photorespiratory Pathways  
705 Contributes to Maize Heterosis. *The Plant Cell* 32: 3706–3722
- 706 Lima F de A e, Westhues M, Cuadros-Inostroza Á, Willmitzer L, Melchinger AE,  
707 Nikoloski Z (2017) Metabolic robustness in young roots underpins a predictive  
708 model of maize hybrid performance in the field. *The Plant Journal* 90: 319–329
- 709 Liu Y (2018) Chapter Four - Darwin's Pangenesis and Certain Anomalous Phenomena.  
710 *In* D Kumar, ed, *Advances in Genetics*. Academic Press, pp 93–120
- 711 Marame F, Desalegne L, Fininsa C, Sigvald R (2009) Genetic analysis for some plant  
712 and fruit traits, and its implication for a breeding program of hot pepper  
713 (*Capsicum annum* var. *annuum* L.). *Hereditas* 146: 131–140
- 714 Meyer RC, Witucka-Wall H, Becher M, Blacha A, Boudichevskaia A, Dörmann P,  
715 Fiehn O, Friedel S, von Korff M, Lisek J, et al (2012) Heterosis manifestation  
716 during early Arabidopsis seedling development is characterized by intermediate  
717 gene expression and enhanced metabolic activity in the hybrids. *The Plant*  
718 *Journal* 71: 669–683
- 719 Muñoz-Ramírez LS, Peña-Yam LP, Avilés-Viñas SA, Canto-Flick A, Guzmán-Antonio  
720 AA, Santana-Buzzy N (2018) Behavior of the Hottest Chili Peppers in the  
721 World Cultivated in Yucatan, Mexico. *HortScience* 53: 1772–1775
- 722 Nankar AN, Tringovska I, Grozeva S, Todorova V, Kostova D (2020) Application of  
723 high-throughput phenotyping tool Tomato Analyzer to characterize Balkan  
724 *Capsicum* fruit diversity. *Scientia Horticulturae* 260: 108862
- 725 Naves ER, de Ávila Silva L, Sulpice R, Araújo WL, Nunes-Nesi A, Peres LEP, Zsögön  
726 A (2019) Capsaicinoids: Pungency beyond *Capsicum*. *Trends in Plant Science*  
727 24: 109–120
- 728 Nimmakayala P, Lopez-Ortiz C, Shahi B, Abburi VL, Natarajan P, Kshetry AO, Shinde  
729 S, Davenport B, Stommel J, Reddy UK (2021) Exploration into natural variation

- 730 for genes associated with fruit shape and size among *Capsicum chinense*  
731 collections. *Genomics* 113: 3002–3014
- 732 Onus AN, Pickersgill B (2004) Unilateral Incompatibility in *Capsicum* (Solanaceae):  
733 Occurrence and Taxonomic Distribution. *Annals of Botany* 94: 289–295
- 734 Osorio S, Alba R, Nikoloski Z, Kochevenko A, Fernie AR, Giovannoni JJ (2012)  
735 Integrative Comparative Analyses of Transcript and Metabolite Profiles from  
736 Pepper and Tomato Ripening and Development Stages Uncover Species-  
737 Specific Patterns of Network Regulatory Behavior. *Plant Physiology* 159: 1713–  
738 1729
- 739 Pang Z, Chong J, Zhou G, de Lima Morais DA, Chang L, Barrette M, Gauthier C,  
740 Jacques P-É, Li S, Xia J (2021) MetaboAnalyst 5.0: narrowing the gap between  
741 raw spectra and functional insights. *Nucleic Acids Research* 49: W388–W396
- 742 Paran I, van der Knaap E (2007) Genetic and molecular regulation of fruit and plant  
743 domestication traits in tomato and pepper. *Journal of Experimental Botany* 58:  
744 3841–3852
- 745 Pereira-Dias L, Vilanova S, Fita A, Prohens J, Rodríguez-Burruezo A (2019) Genetic  
746 diversity, population structure, and relationships in a collection of pepper (*Capsicum*  
747 spp.) landraces from the Spanish centre of diversity revealed by  
748 genotyping-by-sequencing (GBS). *Hortic Res* 6: 1–13
- 749 Pickersgill B (1997) Genetic resources and breeding of *Capsicum* spp. *Euphytica* 96:  
750 129–133
- 751 Pickersgill B (2018) Parallel vs. Convergent Evolution in Domestication and  
752 Diversification of Crops in the Americas. *Front Ecol Evol*. doi:  
753 10.3389/fevo.2018.00056
- 754 Pickersgill B (2007) Domestication of Plants in the Americas: Insights from Mendelian  
755 and Molecular Genetics. *Ann Bot* 100: 925–940
- 756 Pires ND, Grossniklaus U (2014) Different yet similar: evolution of imprinting in  
757 flowering plants and mammals. *F1000prime reports* 6: 63–63
- 758 Riedelsheimer C, Czedik-Eysenberg A, Grieder C, Lisek J, Technow F, Sulpice R,  
759 Altmann T, Stitt M, Willmitzer L, Melchinger AE (2012) Genomic and  
760 metabolic prediction of complex heterotic traits in hybrid maize. *Nature*  
761 *Genetics* 44: 217–220
- 762 Rodríguez GR, Moyseenko JB, Robbins MD, Huarachi Morejón N, Francis DM, van  
763 der Knaap E (2010) Tomato Analyzer: A Useful Software Application to Collect  
764 Accurate and Detailed Morphological and Colorimetric Data from Two-  
765 dimensional Objects. *J Vis Exp*. doi: 10.3791/1856
- 766 Rosado-Souza L, Scossa F, Chaves IS, Kleessen S, Salvador LFD, Milagre JC, Finger  
767 F, Bhering LL, Sulpice R, Araújo WL, et al (2015) Exploring natural variation  
768 of photosynthetic, primary metabolism and growth parameters in a large panel  
769 of *Capsicum chinense* accessions. *Planta* 242: 677–691



- 770 Salem M, Bernach M, Bajdzienko K, Giavalisco P (2017) A Simple Fractionated  
771 Extraction Method for the Comprehensive Analysis of Metabolites, Lipids, and  
772 Proteins from a Single Sample. *J Vis Exp* 55802
- 773 Sandoval-Castro CJ, Valdez-Morales M, Oomah BD, Gutiérrez-Dorado R, Medina-  
774 Godoy S, Espinosa-Alonso LG (2017) Bioactive compounds and antioxidant  
775 activity in scalded Jalapeño pepper industrial byproduct (*Capsicum annuum*). *J*  
776 *Food Sci Technol* 54: 1999–2010
- 777 Scossa F, Roda F, Tohge T, Georgiev MI, Fernie AR (2019) The Hot and the Colorful:  
778 Understanding the Metabolism, Genetics and Evolution of Consumer Preferred  
779 Metabolic Traits in Pepper and Related Species. *Critical Reviews in Plant*  
780 *Sciences* 38: 339–381
- 781 Singh P, Cheema DS, Dhaliwal MS, Garg N (2014) Heterosis and combining ability for  
782 earliness, plant growth, yield and fruit attributes in hot pepper (*Capsicum*  
783 *annuum* L.) involving genetic and cytoplasmic-genetic male sterile lines.  
784 *Scientia Horticulturae* 168: 175–188
- 785 Soltani A, Walter KA, Wiersma AT, Santiago JP, Quiqley M, Chitwood D, Porch TG,  
786 Miklas P, McClean PE, Osorno JM, et al (2021) The genetics and physiology of  
787 seed dormancy, a crucial trait in common bean domestication. *BMC Plant Biol*  
788 21: 58
- 789 Srivastava A, Mangal M (2019) *Capsicum* Breeding: History and Development. *In* N  
790 Ramchiary, C Kole, eds, *The Capsicum Genome*. Springer International  
791 Publishing, Cham, pp 25–55
- 792 Tripodi P, Lo Scalzo R, Ficcadenti N (2020) Dissection of heterotic, genotypic and  
793 environmental factors influencing the variation of yield components and health-  
794 related compounds in chilli pepper (*Capsicum annuum*). *Euphytica* 216: 112
- 795 Tripodi P, Rabanus-Wallace MT, Barchi L, Kale S, Esposito S, Acquadro A,  
796 Schafleitner R, Zonneveld M van, Prohens J, Diez MJ, et al (2021) Global range  
797 expansion history of pepper (*Capsicum* spp.) revealed by over 10,000 genebank  
798 accessions. *PNAS*. doi: 10.1073/pnas.2104315118
- 799 Trueman SJ, Kämper W, Nichols J, Ogbourne SM, Hawkes D, Peters T, Hosseini Bai S,  
800 Wallace HM (2021) Pollen limitation and xenia effects in a cultivated mass-  
801 flowering tree, *Macadamia integrifolia* (Proteaceae). *Annals of Botany*. doi:  
802 10.1093/aob/mcab112
- 803 Vijlder TD, Valkenburg D, Lemièrre F, Romijn EP, Laukens K, Cuyckens F (2018) A  
804 tutorial in small molecule identification via electrospray ionization-mass  
805 spectrometry: The practical art of structural elucidation. *Mass Spectrometry*  
806 *Reviews* 37: 607–629
- 807 Weingartner U, Kaeser O, Long M, Stamp P (2002) Combining Cytoplasmic Male  
808 Sterility and Xenia Increases Grain Yield of Maize Hybrids. *Crop Science* 42:  
809 1848–1856



- 810 Westhues M, Schrag TA, Heuer C, Thaller G, Utz HF, Schipprack W, Thiemann A,  
811 Seifert F, Ehret A, Schlereth A, et al (2017) Omics-based hybrid prediction in  
812 maize. *Theor Appl Genet* 130: 1927–1939
- 813 Yang S, Zhang Z, Chen W, Li X, Zhou S, Liang C, Li X, Yang B, Zou X, Liu F, et al  
814 (2021) Integration of mRNA and miRNA profiling reveals the heterosis of three  
815 hybrid combinations of *Capsicum annuum* varieties. *GM Crops & Food* 12:  
816 224–241
- 817 Yu D, Gu X, Zhang S, Dong S, Miao H, Gebretsadik K, Bo K (2021) Molecular basis of  
818 heterosis and related breeding strategies reveal its importance in vegetable  
819 breeding. *Hortic Res* 8: 1–17
- 820 Zhao Y, Mette MF, Reif JC (2015) Genomic selection in hybrid breeding. *Plant*  
821 *Breeding* 134: 1–10
- 822 Żurawicz E, Studnicki M, Kubik J, Pruski K (2018) A careful choice of compatible  
823 pollinizers significantly improves the size of fruits in red raspberry (*Rubus*  
824 *idaeus* L.). *Scientia Horticulturae* 235: 253–257
- 825



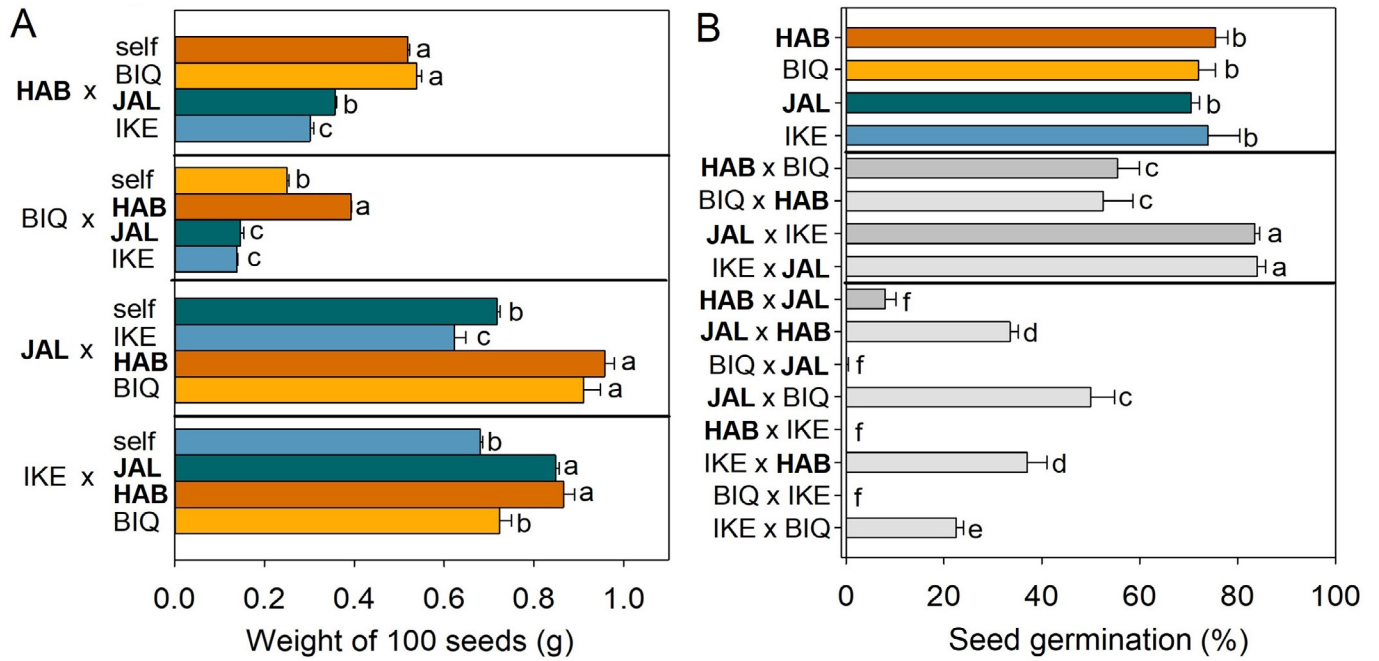

**Figure 2. Seed traits in *Capsicum* cultivars and their hybrids.** A, Seed weight and B, germination in *Capsicum chinense* cv. Habanero (HAB), cv. Biquinho (BIQ), *C. annuum* cv. Jalapeño (JAL), and cv. Ikeda (IKE) and their intra- and interspecific hybrids. The first genotype in each cross represents the pistillate parent. The pungent genotypes are shown in **boldface**. Different letters differ by Scott Knott's 5% test.

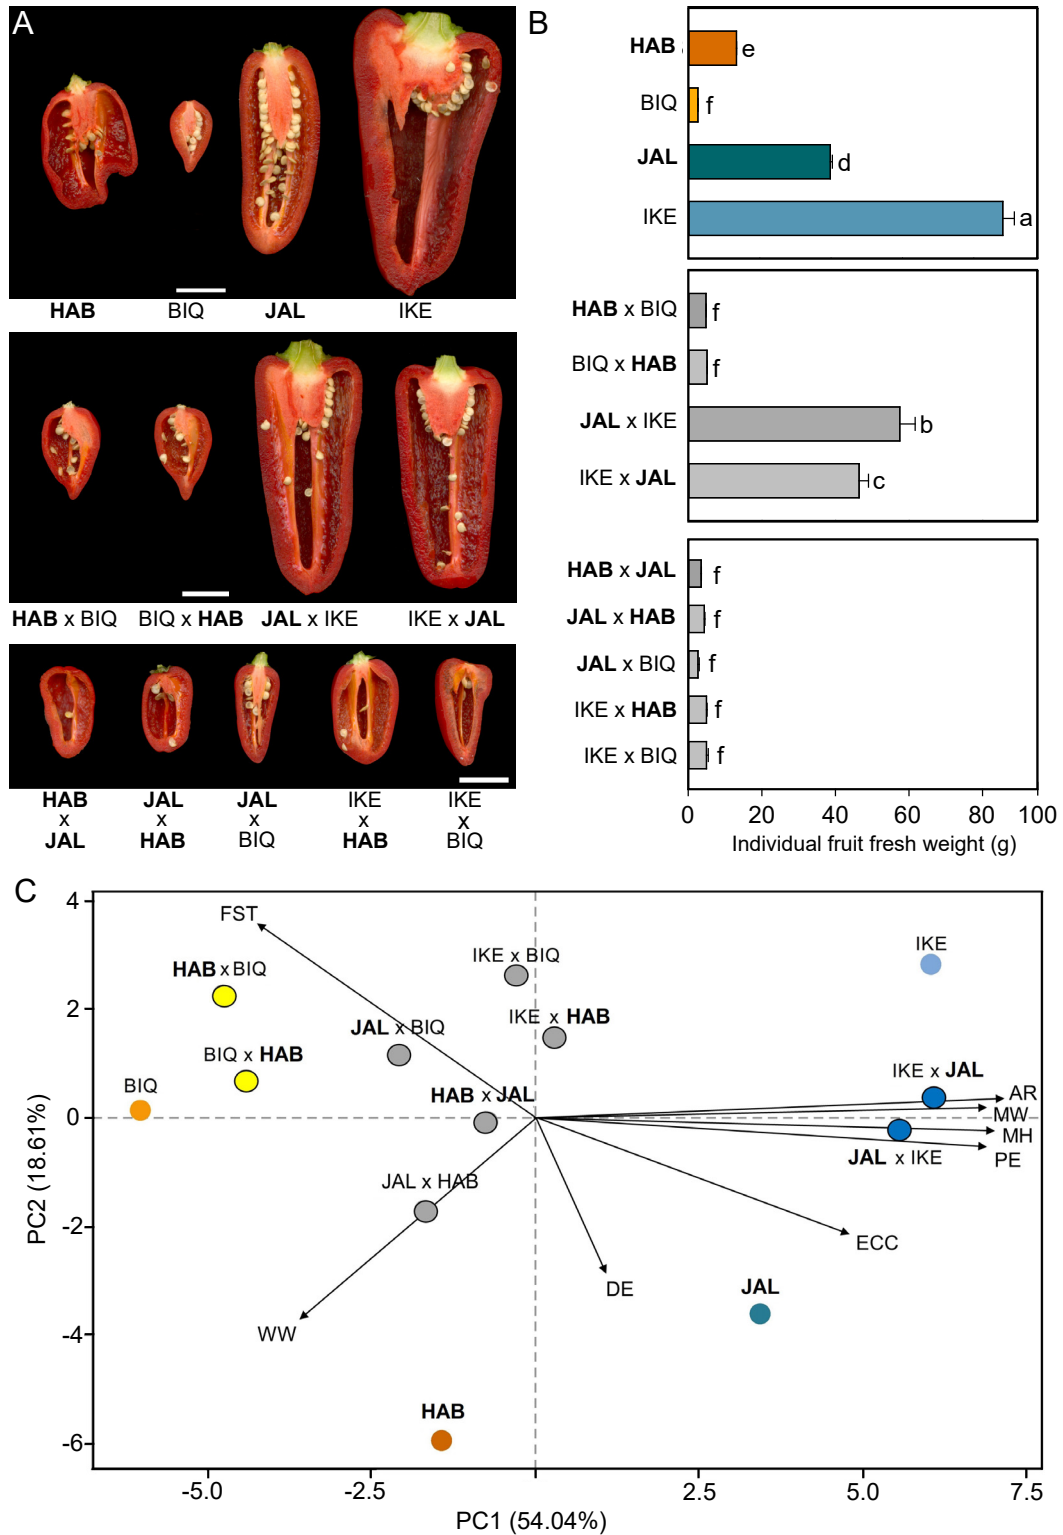

**Figure 3. Fruit size and shape analysis in *Capsicum chinense* cv. Habanero (HAB) and cv. Biquinho (BIQ) and *C. annuum* cv. Jalapeño (JAL) and cv. Cascadura Ikeda (IKE), and their intra- and interspecific  $F_1$  hybrids.** A, Representative fruit cross-sections of the parental lines (top), intraspecific hybrids (middle) and interspecific hybrids (bottom). The pungent genotypes are shown in boldface. Scale bars 2 = cm. B, individual fruit fresh weight (g). Bars are means  $\pm$  s.e.m. (n=10). Letters show significant differences by ANOVA followed by Scot Knott's 5% test. C, PCA biplot of 13 *Capsicum* genotypes (parents, intraspecific and interspecific hybrids) based on the variance in 32 fruit biometric parameters, explained by two PC axes (PC1 and PC2). The two components explained 54.04% and 18.61% of the variance, respectively. Parental genotypes are represented by circles of different colours, intraspecific *C. annuum* hybrids by blue with black outline, *C. chinense* by red with black outline and interspecific hybrids in gray. The pungent genotypes are shown in boldface.

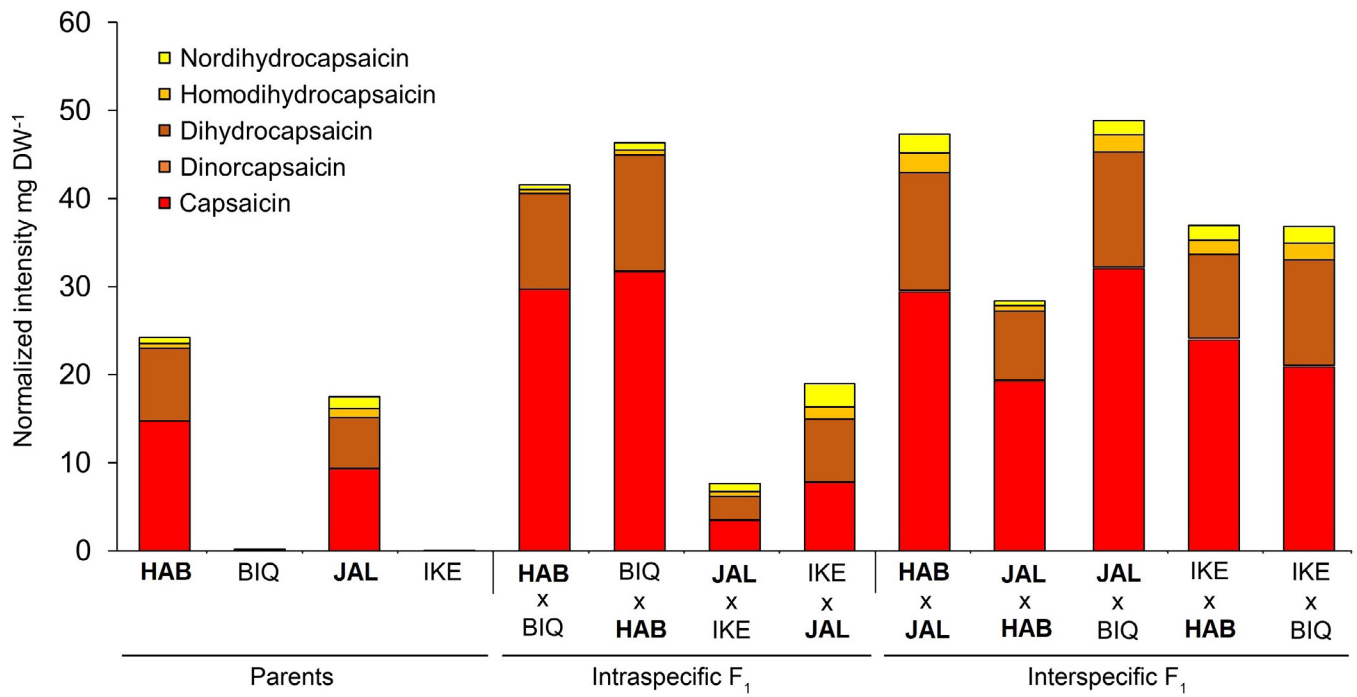

**Figure 4. Relative capsacinoid content in the placenta of *Capsicum chinense* cv. Habanero (HAB), cv. Biquinho (BIQ), and *C. annuum* cv. Jalapeño (JAL) and cv. Cascadura Ikeda (IKE) and their intra- and interspecific hybrids. The pungent genotypes are shown in **boldface**. Each column represents the mean value per genotype (n=7).**

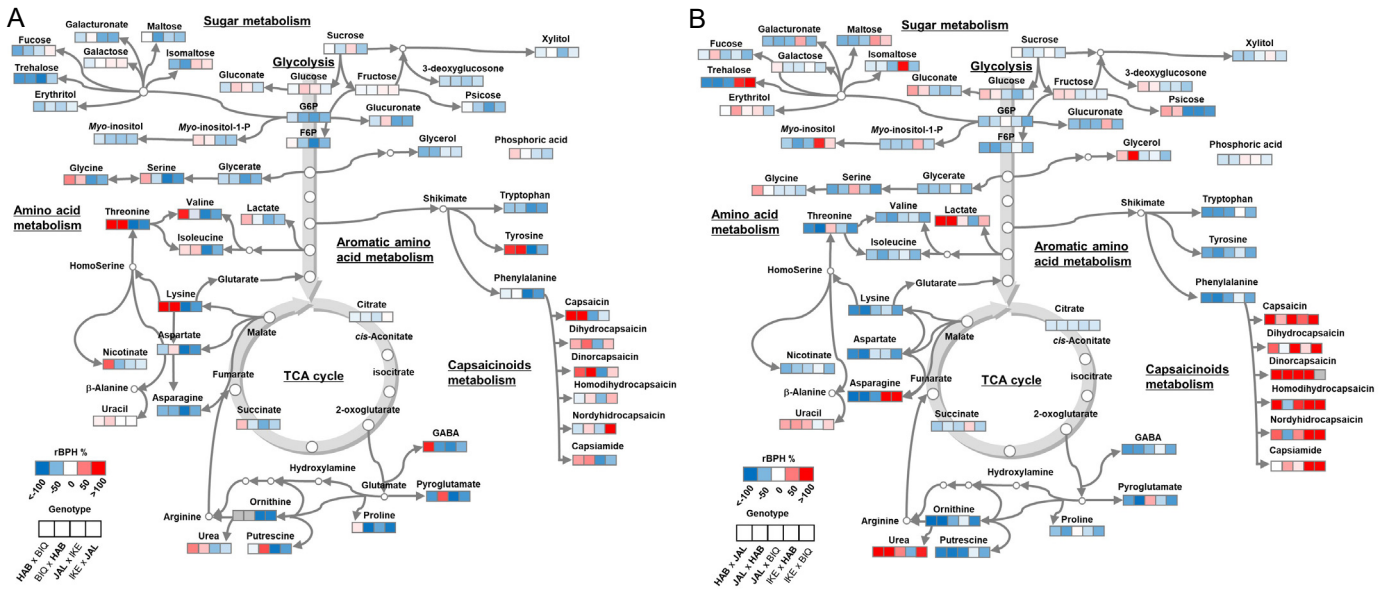

## Parsed Citations

Baenas N, Belović M, Ilic N, Moreno DA, García-Viguera C (2019) Industrial use of pepper (*Capsicum annum* L.) derived products: Technological benefits and biological advantages. *Food Chemistry* 274: 872–885

Google Scholar: [Author Only](#) [Title Only](#) [Author and Title](#)

Bajpai PK, Reichelt M, Augustine R, Gershenzon J, Bisht NC (2019) Heterotic patterns of primary and secondary metabolites in the oilseed crop *Brassica juncea*. *Heredity* 123: 318–336

Google Scholar: [Author Only](#) [Title Only](#) [Author and Title](#)

Barboza GE, García CC, González SL, Scaldaferrero M, Reyes X (2019) Four new species of *Capsicum* (Solanaceae) from the tropical Andes and an update on the phylogeny of the genus. *PLOS ONE* 14: e0209792

Google Scholar: [Author Only](#) [Title Only](#) [Author and Title](#)

Barchenger DW, Bosland PW (2016) Exogenous applications of capsaicin inhibits seed germination of *Capsicum annum*. *Scientia Horticulturae* 203: 29–31

Google Scholar: [Author Only](#) [Title Only](#) [Author and Title](#)

Barth S, Busimi AK, Friedrich Utz H, Melchinger AE (2003) Heterosis for biomass yield and related traits in five hybrids of *Arabidopsis thaliana* L. Heynh. *Heredity* 91: 36–42

Google Scholar: [Author Only](#) [Title Only](#) [Author and Title](#)

Bernacchi D, Beck-Bunn T, Eshed Y, Lopez J, Petiard V, Uhlig J, Zamir D, Tanksley S (1998) Advanced backcross QTL analysis in tomato. I. Identification of QTLs for traits of agronomic importance from *Lycopersicon hirsutum*. *Theor Appl Genet* 97: 381–397

Google Scholar: [Author Only](#) [Title Only](#) [Author and Title](#)

Bianchi PA, Silva LRA da, Alencar AA da S, Santos PHAD, Pimenta S, Sudre CP, Corte LE-D, Goncalves LSA, Rodrigues R (2020) Biomorphological Characterization of Brazilian *Capsicum Chinense* Jacq. Germplasm. *Agronomy* 10: 1ec–1ec

Google Scholar: [Author Only](#) [Title Only](#) [Author and Title](#)

Boster JS (1985) Selection for perceptual distinctiveness: Evidence from aguaruna cultivars of *Manihot esculenta*. *Econ Bot* 39: 310–325

Google Scholar: [Author Only](#) [Title Only](#) [Author and Title](#)

Carrizo García C, Barfuss MHJ, Sehr EM, Barboza GE, Samuel R, Moscone EA, Ehrendorfer F (2016) Phylogenetic relationships, diversification and expansion of chili peppers (*Capsicum*, Solanaceae). *Annals of Botany* 118: 35–51

Google Scholar: [Author Only](#) [Title Only](#) [Author and Title](#)

Chen ZJ (2013) Genomic and epigenetic insights into the molecular bases of heterosis. *Nature Reviews Genetics* 14: 471–82

Google Scholar: [Author Only](#) [Title Only](#) [Author and Title](#)

Colonna V, D'Agostino N, Garrison E, Albrechtsen A, Meisner J, Facchiano A, Cardi T, Tripodi P (2019) Genomic diversity and novel genome-wide association with fruit morphology in *Capsicum*, from 746k polymorphic sites. *Sci Rep* 9: 10067

Google Scholar: [Author Only](#) [Title Only](#) [Author and Title](#)

Di Dato F, Parisi M, Cardi T, Tripodi P (2015) Genetic diversity and assessment of markers linked to resistance and pungency genes in *Capsicum* germplasm. *Euphytica* 204: 103–119

Google Scholar: [Author Only](#) [Title Only](#) [Author and Title](#)

Duc G, Moessner A, Moussy F, Mousset-Déclas C (2001) Axenia effect on number and volume of cotyledon cells and on seed weight in faba bean (*Vicia faba* L.). *Euphytica* 117: 169–174

Google Scholar: [Author Only](#) [Title Only](#) [Author and Title](#)

Fernie AR, Aharoni A, Willmitzer L, Stitt M, Tohge T, Kopka J, Carroll AJ, Saito K, Fraser PD, DeLuca V (2011) Recommendations for reporting metabolite data. *Plant Cell* 23: 2477–82

Google Scholar: [Author Only](#) [Title Only](#) [Author and Title](#)

Galili G, Amir R, Fernie AR (2016) The Regulation of Essential Amino Acid Synthesis and Accumulation in Plants. *Annual Review of Plant Biology* 67: 153–178

Google Scholar: [Author Only](#) [Title Only](#) [Author and Title](#)

Garcés-Claver A, Gil-Ortega R, Álvarez-Fernández A, Arnedo-Andrés MS (2007) Inheritance of Capsaicin and Dihydrocapsaicin, Determined by HPLC-ESI/MS, in an Intraspecific Cross of *Capsicum annum* L. *J Agric Food Chem* 55: 6951–6957

Google Scholar: [Author Only](#) [Title Only](#) [Author and Title](#)

Hochholdinger F, Baldauf JA (2018) Heterosis in plants. *Curr Biol* 28: R1089–R1092

Google Scholar: [Author Only](#) [Title Only](#) [Author and Title](#)

Hufford MB, Berny Mier y Teran JC, Gepts P (2019) Crop Biodiversity: An Unfinished Magnum Opus of Nature. *Annual Review of Plant Biology* 70: 727–751

Google Scholar: [Author Only](#) [Title Only](#) [Author and Title](#)

Jang S, Park M, Lee D-G, Lim J-H, Jung J-W, Kang B-C (2021) Breeding *Capsicum chinense* Lines with High Levels of Capsaicinoids



**and Capsinoids in the Fruit. *Agriculture* 11: 819**

Google Scholar: [Author Only](#) [Title Only](#) [Author and Title](#)

**Joseph B, Corwin JA, Li B, Atwell S, Kliebenstein DJ (2013) Cytoplasmic genetic variation and extensive cytonuclear interactions influence natural variation in the metabolome. *eLife* 2: e00776**

Google Scholar: [Author Only](#) [Title Only](#) [Author and Title](#)

**Kim Y-J, Zhang D (2018) Molecular Control of Male Fertility for Crop Hybrid Breeding. *Trends in Plant Science* 23: 53–65**

Google Scholar: [Author Only](#) [Title Only](#) [Author and Title](#)

**Kopka J, Schauer N, Krueger S, Birkemeyer C, Usadel B, Bergmüller E, Dörmann P, Weckwerth W, Gibon Y, Stitt M, et al (2005) Systems biology GMD@CSB.DB : the Golm Metabolome Database. 21: 1635–1638**

Google Scholar: [Author Only](#) [Title Only](#) [Author and Title](#)

**Kyriacou MC, Roupshael Y, Colla G, Zrenner R, Schwarz D (2017) Vegetable Grafting: The Implications of a Growing Agronomic Imperative for Vegetable Fruit Quality and Nutritive Value. *Frontiers in Plant Science* 8: 741**

Google Scholar: [Author Only](#) [Title Only](#) [Author and Title](#)

**Lafon-Placette C, Köhler C (2016) Endosperm-based postzygotic hybridization barriers: developmental mechanisms and evolutionary drivers. *Molecular Ecology* 25: 2620–2629**

Google Scholar: [Author Only](#) [Title Only](#) [Author and Title](#)

**Lapidot-Cohen T, Rosental L, Brotman Y (2020) Liquid Chromatography–Mass Spectrometry (LC-MS)-Based Analysis for Lipophilic Compound Profiling in Plants. *Current Protocols in Plant Biology* 5: e20109**

Google Scholar: [Author Only](#) [Title Only](#) [Author and Title](#)

**Li Z, Zhu A, Song Q, Chen HY, Harmon FG, Chen ZJ (2020) Temporal Regulation of the Metabolome and Proteome in Photosynthetic and Photorespiratory Pathways Contributes to Maize Heterosis. *The Plant Cell* 32: 3706–3722**

Google Scholar: [Author Only](#) [Title Only](#) [Author and Title](#)

**Lima F de Ae, Westhues M, Cuadros-Inostroza Á, Willnitzer L, Melchinger AE, Nikoloski Z (2017) Metabolic robustness in young roots underpins a predictive model of maize hybrid performance in the field. *The Plant Journal* 90: 319–329**

Google Scholar: [Author Only](#) [Title Only](#) [Author and Title](#)

**Liu Y (2018) Chapter Four - Darwin's Pangenesis and Certain Anomalous Phenomena. In D Kumar, ed, *Advances in Genetics*. Academic Press, pp 93–120**

Google Scholar: [Author Only](#) [Title Only](#) [Author and Title](#)

**Maramé F, Desalegne L, Fininsa C, Sigvald R (2009) Genetic analysis for some plant and fruit traits, and its implication for a breeding program of hot pepper (*Capsicum annum* var. *annuum* L.). *Hereditas* 146: 131–140**

Google Scholar: [Author Only](#) [Title Only](#) [Author and Title](#)

**Meyer RC, Wtucka-Wall H, Becher M, Blacha A, Boudichevskaia A, Dörmann P, Fiehn O, Friedel S, von Korff M, Lisek J, et al (2012) Heterosis manifestation during early Arabidopsis seedling development is characterized by intermediate gene expression and enhanced metabolic activity in the hybrids. *The Plant Journal* 71: 669–683**

Google Scholar: [Author Only](#) [Title Only](#) [Author and Title](#)

**Muñoz-Ramírez LS, Peña-Yam LP, Avilés-Viñas SA, Canto-Flick A, Guzmán-Antonio AA, Santana-Buzzy N (2018) Behavior of the Hottest Chili Peppers in the World Cultivated in Yucatan, Mexico. *HortScience* 53: 1772–1775**

Google Scholar: [Author Only](#) [Title Only](#) [Author and Title](#)

**Nankar AN, Tringovska I, Grozeva S, Todorova V, Kostova D (2020) Application of high-throughput phenotyping tool Tomato Analyzer to characterize Balkan Capsicum fruit diversity. *Scientia Horticulturae* 260: 108862**

Google Scholar: [Author Only](#) [Title Only](#) [Author and Title](#)

**Naves ER, de Ávila Silva L, Sulpice R, Araújo WL, Nunes-Nesi A, Peres LEP, Zsögön A (2019) Capsaicinoids: Pungency beyond Capsicum. *Trends in Plant Science* 24: 109–120**

Google Scholar: [Author Only](#) [Title Only](#) [Author and Title](#)

**Nimmakayala P, Lopez-Ortiz C, Shahi B, Abburi VL, Natarajan P, Kshetry AO, Shinde S, Davenport B, Stommel J, Reddy UK (2021) Exploration into natural variation for genes associated with fruit shape and size among Capsicum chinense collections. *Genomics* 113: 3002–3014**

Google Scholar: [Author Only](#) [Title Only](#) [Author and Title](#)

**Onus AN, Pickersgill B (2004) Unilateral Incompatibility in Capsicum (Solanaceae): Occurrence and Taxonomic Distribution. *Annals of Botany* 94: 289–295**

Google Scholar: [Author Only](#) [Title Only](#) [Author and Title](#)

**Osorio S, Alba R, Nikoloski Z, Kochevenko A, Fernie AR, Giovannoni JJ (2012) Integrative Comparative Analyses of Transcript and Metabolite Profiles from Pepper and Tomato Ripening and Development Stages Uncovers Species-Specific Patterns of Network Regulatory Behavior. *Plant Physiology* 159: 1713–1729**

Google Scholar: [Author Only](#) [Title Only](#) [Author and Title](#)

**Pang Z, Chong J, Zhou G, de Lima Morais DA, Chang L, Barrette M, Gauthier C, Jacques P-É, Li S, Xia J (2021) MetaboAnalyst 5.0:**



narrowing the gap between raw spectra and functional insights. *Nucleic Acids Research* 49: W388–W396

Google Scholar: [Author Only](#) [Title Only](#) [Author and Title](#)

Paran I, van der Knaap E (2007) Genetic and molecular regulation of fruit and plant domestication traits in tomato and pepper. *Journal of Experimental Botany* 58: 3841–3852

Google Scholar: [Author Only](#) [Title Only](#) [Author and Title](#)

Pereira-Dias L, Vilanova S, Fita A, Prohens J, Rodríguez-Burruezo A (2019) Genetic diversity, population structure, and relationships in a collection of pepper (*Capsicum* spp.) landraces from the Spanish centre of diversity revealed by genotyping-by-sequencing (GBS). *Hortic Res* 6: 1–13

Google Scholar: [Author Only](#) [Title Only](#) [Author and Title](#)

Pickersgill B (1997) Genetic resources and breeding of *Capsicum* spp. *Euphytica* 96: 129–133

Google Scholar: [Author Only](#) [Title Only](#) [Author and Title](#)

Pickersgill B (2018) Parallel vs. Convergent Evolution in Domestication and Diversification of Crops in the Americas. *Front Ecol Evol*. doi: 10.3389/fevo.2018.00056

Google Scholar: [Author Only](#) [Title Only](#) [Author and Title](#)

Pickersgill B (2007) Domestication of Plants in the Americas: Insights from Mendelian and Molecular Genetics. *Ann Bot* 100: 925–940

Google Scholar: [Author Only](#) [Title Only](#) [Author and Title](#)

Pires ND, Grossniklaus U (2014) Different yet similar: evolution of imprinting in flowering plants and mammals. *F1000prime reports* 6: 63–63

Google Scholar: [Author Only](#) [Title Only](#) [Author and Title](#)

Riedelsheimer C, Czedik-Eysenberg A, Grieder C, Lisec J, Technow F, Sulpice R, Altmann T, Stitt M, Willmitzer L, Melchinger AE (2012) Genomic and metabolic prediction of complex heterotic traits in hybrid maize. *Nature Genetics* 44: 217–220

Google Scholar: [Author Only](#) [Title Only](#) [Author and Title](#)

Rodríguez GR, Moysenko JB, Robbins MD, Huarachi Morejón N, Francis DM, van der Knaap E (2010) Tomato Analyzer: A Useful Software Application to Collect Accurate and Detailed Morphological and Colorimetric Data from Two-dimensional Objects. *J Vis Exp*. doi: 10.3791/1856

Google Scholar: [Author Only](#) [Title Only](#) [Author and Title](#)

Rosado-Souza L, Scossa F, Chaves IS, Kleessen S, Salvador LFD, Milagre JC, Finger F, Bhering LL, Sulpice R, Araújo WL, et al (2015) Exploring natural variation of photosynthetic, primary metabolism and growth parameters in a large panel of *Capsicum chinense* accessions. *Planta* 242: 677–691

Google Scholar: [Author Only](#) [Title Only](#) [Author and Title](#)

Salem M, Bernach M, Bajdzienko K, Giavalisco P (2017) A Simple Fractionated Extraction Method for the Comprehensive Analysis of Metabolites, Lipids, and Proteins from a Single Sample. *J Vis Exp* 55802

Google Scholar: [Author Only](#) [Title Only](#) [Author and Title](#)

Sandoval-Castro CJ, Valdez-Morales M, Oomah BD, Gutiérrez-Dorado R, Medina-Godoy S, Espinosa-Alonso LG (2017) Bioactive compounds and antioxidant activity in scalded Jalapeño pepper industrial byproduct (*Capsicum annum*). *J Food Sci Technol* 54: 1999–2010

Google Scholar: [Author Only](#) [Title Only](#) [Author and Title](#)

Scossa F, Roda F, Tohge T, Georgiev MI, Fernie AR (2019) The Hot and the Colorful: Understanding the Metabolism, Genetics and Evolution of Consumer Preferred Metabolic Traits in Pepper and Related Species. *Critical Reviews in Plant Sciences* 38: 339–381

Google Scholar: [Author Only](#) [Title Only](#) [Author and Title](#)

Singh P, Cheema DS, Dhaliwal MS, Garg N (2014) Heterosis and combining ability for earliness, plant growth, yield and fruit attributes in hot pepper (*Capsicum annum* L.) involving genetic and cytoplasmic-genetic male sterile lines. *Scientia Horticulturae* 168: 175–188

Google Scholar: [Author Only](#) [Title Only](#) [Author and Title](#)

Soltani A, Walter KA, Wiersma AT, Santiago JP, Quijley M, Chitwood D, Porch TG, Miklas P, McClean PE, Osorno JM, et al (2021) The genetics and physiology of seed dormancy, a crucial trait in common bean domestication. *BMC Plant Biol* 21: 58

Google Scholar: [Author Only](#) [Title Only](#) [Author and Title](#)

Srivastava A, Mangal M (2019) *Capsicum* Breeding: History and Development. In N Ramchiary, C Kole, eds, *The Capsicum Genome*. Springer International Publishing, Cham, pp 25–55

Google Scholar: [Author Only](#) [Title Only](#) [Author and Title](#)

Tripodi P, Lo Scalzo R, Ficcadenti N (2020) Dissection of heterotic, genotypic and environmental factors influencing the variation of yield components and health-related compounds in chilli pepper (*Capsicum annum*). *Euphytica* 216: 112

Google Scholar: [Author Only](#) [Title Only](#) [Author and Title](#)

Tripodi P, Rabanus-Wallace MT, Barchi L, Kale S, Esposito S, Acquadro A, Schafleitner R, Zonneveld M van, Prohens J, Diez MJ, et al (2021) Global range expansion history of pepper (*Capsicum* spp.) revealed by over 10,000 genebank accessions. *PNAS*. doi: 10.1073/pnas.2104315118

Google Scholar: [Author Only](#) [Title Only](#) [Author and Title](#)

Trueman SJ, Kämper W, Nichols J, Ogbourne SM, Hawkes D, Peters T, Hosseini Bai S, Wallace HM (2021) Pollen limitation and xenia effects in a cultivated mass-flowering tree, *Macadamia integrifolia* (Proteaceae). *Annals of Botany*. doi: 10.1093/aob/mcab112

Google Scholar: [Author Only](#) [Title Only](#) [Author and Title](#)

Vijlder TD, Valkenburg D, Lemière F, Romijn EP, Laukens K, Cuyckens F (2018) A tutorial in small molecule identification via electrospray ionization-mass spectrometry: The practical art of structural elucidation. *Mass Spectrometry Reviews* 37: 607–629

Google Scholar: [Author Only](#) [Title Only](#) [Author and Title](#)

Weingartner U, Kaeser O, Long M, Stamp P (2002) Combining Cytoplasmic Male Sterility and Xenia Increases Grain Yield of Maize Hybrids. *Crop Science* 42: 1848–1856

Google Scholar: [Author Only](#) [Title Only](#) [Author and Title](#)

Westhues M, Schrag TA, Heuer C, Thaller G, Utz HF, Schipprack W, Thiemann A, Seifert F, Ehret A, Schlereth A, et al (2017) Omics-based hybrid prediction in maize. *Theor Appl Genet* 130: 1927–1939

Google Scholar: [Author Only](#) [Title Only](#) [Author and Title](#)

Yang S, Zhang Z, Chen W, Li X, Zhou S, Liang C, Li X, Yang B, Zou X, Liu F, et al (2021) Integration of mRNA and miRNA profiling reveals the heterosis of three hybrid combinations of *Capsicum annuum* varieties. *GM Crops & Food* 12: 224–241

Google Scholar: [Author Only](#) [Title Only](#) [Author and Title](#)

Yu D, Gu X, Zhang S, Dong S, Miao H, Gebretsadik K, Bo K (2021) Molecular basis of heterosis and related breeding strategies reveal its importance in vegetable breeding. *Hortic Res* 8: 1–17

Google Scholar: [Author Only](#) [Title Only](#) [Author and Title](#)

Zhao Y, Mette MF, Reif JC (2015) Genomic selection in hybrid breeding. *Plant Breeding* 134: 1–10

Google Scholar: [Author Only](#) [Title Only](#) [Author and Title](#)

Żurawicz E, Studnicki M, Kubik J, Pruski K (2018) A careful choice of compatible pollinizers significantly improves the size of fruits in red raspberry (*Rubus idaeus* L.). *Scientia Horticulturae* 235: 253–257

Google Scholar: [Author Only](#) [Title Only](#) [Author and Title](#)
